# Supplementary material for: VCD spectroscopy as an excellent probe of chiral metal complexes containing a carbon monoxide vibrational chromophore
Source: Royal Society of Chemistry journal article supplement (doi:10.1039/c5cc02170g), 2015-01-01
Supplement: c5cc02170g1.pdf [file c5cc02170g1.pdf]

## **VCD Spectra of Chiral Metal Complexes containing a Carbon Monoxide Vibrational Chromophore**

Marco Fusè, Giuseppe Mazzeo, Giovanna Longhi, Sergio Abbate, Daniele Zerla, Isabella Rimoldi, Alessandro Contini, Edoardo Cesarotti\*

# Supporting information

## Contents

|                                                                                                                                                                |    |
|----------------------------------------------------------------------------------------------------------------------------------------------------------------|----|
| Supporting information .....                                                                                                                                   | 1  |
| 1. General methods.....                                                                                                                                        | 2  |
| 2. Synthesis of the complexes.....                                                                                                                             | 2  |
| 3. VCD Experimental data .....                                                                                                                                 | 2  |
| 4. NOE structure analysis .....                                                                                                                                | 3  |
| 4.1 Intensity matrices.....                                                                                                                                    | 4  |
| 5. NMR spectra.....                                                                                                                                            | 6  |
| 5.1 T-4-S- $\eta^5$ -[(1R,2S,5R)-menthyl]-C <sub>5</sub> H <sub>4</sub> )Ru(CO)(P(C <sub>6</sub> H <sub>5</sub> ) <sub>3</sub> )Cl] ((S) <sub>Ru</sub> ) ..... | 6  |
| 5.2 T-4-R- $\eta^5$ -[(1R,2S,5R)-menthyl]-C <sub>5</sub> H <sub>4</sub> )Ru(CO)(P(C <sub>6</sub> H <sub>5</sub> ) <sub>3</sub> )Cl] ((R) <sub>Ru</sub> ) ..... | 12 |
| 6. DFT CALCULATIONS.....                                                                                                                                       | 18 |
| 7. DFT optimized geometries .....                                                                                                                              | 18 |
| 7.1 (S) <sub>Ru</sub> .....                                                                                                                                    | 18 |
| 7.1.1 (S) conformer a .....                                                                                                                                    | 18 |
| 7.1.2 (S) conformer b .....                                                                                                                                    | 19 |
| 7.1.3 (S) conformer c .....                                                                                                                                    | 21 |
| 7.1.4 (S) conformer d .....                                                                                                                                    | 22 |
| 7.2 (R) <sub>Ru</sub> .....                                                                                                                                    | 23 |
| 7.2.1 (R) conformer a .....                                                                                                                                    | 23 |
| 7.2.2 (R) conformer b .....                                                                                                                                    | 24 |
| 7.2.3 (R) conformer c .....                                                                                                                                    | 25 |
| 7.2.4 (R) conformer d .....                                                                                                                                    | 27 |
| 8. Table of interatomic distances.....                                                                                                                         | 28 |
| 9. References.....                                                                                                                                             | 29 |

## 1. General methods

All commercially available compounds were purified by distillation or crystallization before use.  $^1\text{H}$ ,  $^{13}\text{C}$ , and  $^{31}\text{P}$  NMR spectra were recorded in  $\text{CDCl}_3$  on Bruker DRX Avance 300 MHz equipped with a non-reverse probe or Bruker DRX Avance 400 MHz. Chemical shifts (in ppm) were referenced to residual solvent proton/carbon peak or using external standard 85%  $\text{H}_3\text{PO}_4$  for  $^{31}\text{P}$  NMR. IR and VCD spectra were taken on a Jasco FVS6000 apparatus. Elemental analyses were recorded in the analytical laboratories of Milan University on Perkin Elmer Series II CHNS/O Analyzer 2400.

## 2. Synthesis of the complexes

The complexes were synthesized as reported in reference<sup>51</sup> with freshly distilled n-heptane as reaction solvents and separated by flash chromatography (silica gel; cyclohexane/ethylacetate, 9/1, 1psi). ( $S$ )<sub>Ru</sub> is the first eluted complex.

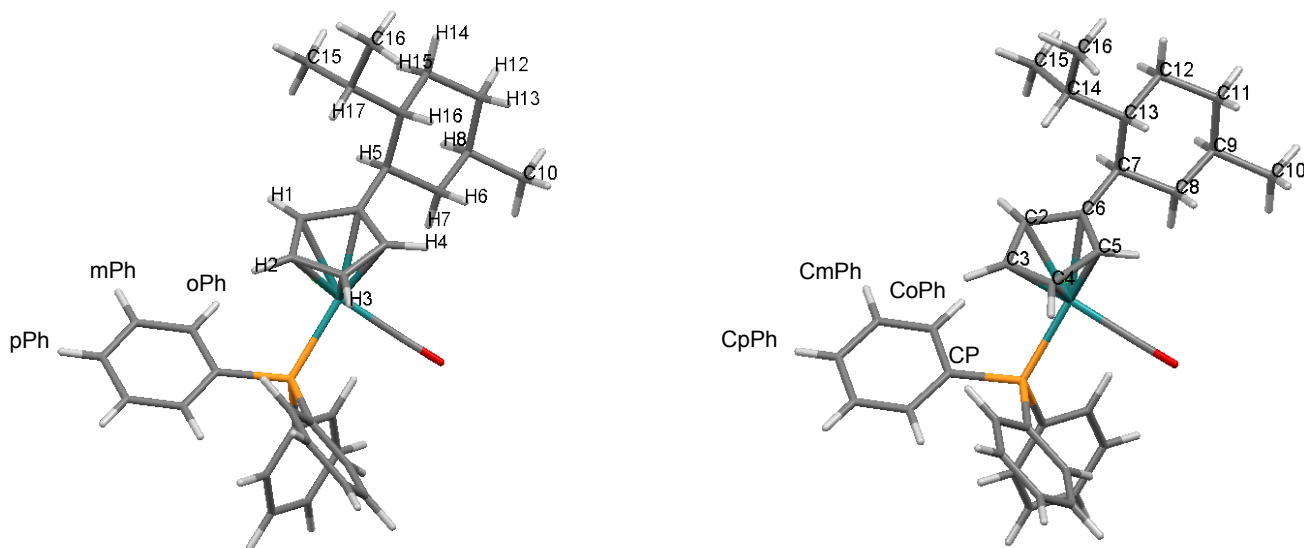

Figure 1S1. Proton (left) and carbon (right) labels referred to the crystallographic structure<sup>51</sup>. For ( $R$ )<sub>Ru</sub> were retained the same labels.

### 2.1. T-4-S- $\eta$ 5-[(1R,2S,5R)-menthyl]- $\text{C}_5\text{H}_4$ )Ru(CO)(P( $\text{C}_6\text{H}_5$ ) $_3$ )Cl] (( $S$ )<sub>Ru</sub>)

Yellow powder.  $^1\text{H-NMR}$  (300 MHz,  $\text{CDCl}_3$ )  $\delta$  7.65 – 7.52 (m, 6H, oPh), 7.46 – 7.34 (m, 9H, mPh/pPh), 5.15 (s, 1H, H1), 4.72 (s, 1H, H4), 4.68 (s, 1H, H2), 3.78 (s, 1H, H3), 2.34 – 2.18 (m, 2H, H7/H5), 1.94 – 1.62 (m, 3H, H17/H12/H15), 1.56 – 1.41 (m, 1H, H8), 1.16 – 0.97 (m, 2H, H14/H16), 0.95 (d,  $J$  = 6.5 Hz, 3H, C10), 0.90 (m, 2H, H6/H13), 0.86 (d,  $J$  = 6.9 Hz, 3H, C16), 0.82 (d,  $J$  = 6.8 Hz, 3H, C15);  $^{31}\text{P}\{^1\text{H}\}\text{-NMR}$  (121 MHz,  $\text{CDCl}_3$ )  $\delta$  49.08 (s, 1P);  $^{13}\text{C}\{^1\text{H}\}\text{-NMR}$  (75 MHz,  $\text{CDCl}_3$ )  $\delta$  204.78 (d,  $J$  (C,P) = 21.1 Hz, CO), 135.47 (dd,  $J$  (C,P) = 47.3 Hz, CP), 134.03 (d,  $J$  (C,P) = 10.8 Hz, oPh), 130.54 (s, pPh), 128.62 (d,  $J$  (C,P) = 10.2 Hz, mPh), 114.27 (d,  $J$  (C,P) = 8.0 Hz, C6), 94.79 (s, C2), 89.86 (s, C3), 79.82 (d,  $J$  (C,P) = 2.3 Hz, C5), 75.14 (s, C4), 50.89 (s, C13), 43.53 (s, C8), 38.42 (s, C7), 35.64 (s, C11), 33.34 (s, C9), 27.84 (s, C14), 25.15 (s, C12), 22.85 (s, C10), 22.07 (s, C16), 16.04 (s, C15); IR 1959  $\text{cm}^{-1}$  vs(CO stretching), 1482, 1457, 1436  $\text{cm}^{-1}$  m (aromatics and HCH bendings), 1386, 1370, 1349, 1261,  $\text{cm}^{-1}$  w (methyl and aromatic deformations) 1187, 1095  $\text{cm}^{-1}$  s (PPh $_3$  CC stretchings); EA  $\text{C}_{34}\text{H}_{38}\text{ClOPRu}$  calculated C: 64.81%, H: 6.04% found: C: 65.12%, H: 6.11%.

### 2.2. T-4-S- $\eta$ 5-[(1R,2S,5R)-menthyl]- $\text{C}_5\text{H}_4$ )Ru(CO)(P( $\text{C}_6\text{H}_5$ ) $_3$ )Cl] (( $R$ )<sub>Ru</sub>)

Yellow powder.  $^1\text{H-NMR}$  (300 MHz,  $\text{CDCl}_3$ )  $\delta$  7.68 – 7.47 (m, 6H, oPh), 7.42 (m, 9H, mPh/pPh), 5.23 (s, 1H, H4), 4.80 (s, 1H, H3), 4.50 (s, 1H, H2), 4.22 (s, 1H, H1), 2.14 (m, 1H, H7), 1.93-1.75 (m, 1H, H5), 1.73 – 1.53 (m, 3H, H17/H12/H15), 1.49 – 1.34 (m, 1H, H8), 1.19 – 0.98 (m, 1H, H6), 0.94 (d,  $J$  = 6.4 Hz, 3H, C10), 0.98 – 0.86 (m, 3H, H14/H16/H13), 0.83 (d,  $J$  = 6.8 Hz, 3H, C16), 0.69 (d,  $J$  = 6.7 Hz, 3H, C15);  $^{31}\text{P}\{^1\text{H}\}\text{-NMR}$  (121 MHz,  $\text{CDCl}_3$ )  $\delta$  49.18 (s, 1P);  $^{13}\text{C}\{^1\text{H}\}\text{-NMR}$  (75 MHz,  $\text{CDCl}_3$ )  $\delta$  204.80 (d,  $J$  (C,P) = 21.3 Hz, CO), 135.60 (d,  $J$  (C,P) = 47.4 Hz, CP), 134.00 (d,  $J$  (C,P) = 10.8 Hz, oPh), 130.96 (s, pPh), 128.64 (d,  $J$  (C,P) = 10.2 Hz, mPh), 113.83 (d,  $J$  (C,P) = 4.2 Hz, C6), 91.01 (d,  $J$  (C,P) = 4.9 Hz, C5), 86.95 (s, C4), 84.80 (s, C3), 78.89 (s, C2), 51.12 (s, C13), 43.32 (s, C8), 39.31 (s, C7), 35.55 (s, C11), 33.38 (s, C9), 33.18 (s, C14), 27.48 (s, C12), 22.74 (s, C10), 21.93 (s, C16), 15.92 (s, C15); IR 1959  $\text{cm}^{-1}$  vs(CO stretching), 1482, 1457, 1436  $\text{cm}^{-1}$  m (aromatics and HCH bendings), 1386, 1370, 1349, 1261,  $\text{cm}^{-1}$  w (methyl and aromatic deformations) 1187, 1095  $\text{cm}^{-1}$  s (PPh $_3$  CC stretchings); EA  $\text{C}_{34}\text{H}_{38}\text{ClOPRu}$  calculated C: 64.81%, H: 6.04% found: C: 65.08%, H: 5.93%.

## 3. VCD Experimental data

VCD spectra have been taken for  $\text{CCl}_4$  solutions in the range 2100-850  $\text{cm}^{-1}$ . In the range 2100-1800  $\text{cm}^{-1}$  we set 8  $\text{cm}^{-1}$  resolution (concentration 0.036M), while in the range 1700-850  $\text{cm}^{-1}$  we set 4  $\text{cm}^{-1}$  resolution with concentrations 0.09M for  $R_{Ru}$  and 0.073  $S_{Ru}$ . In both

frequency regions 2000 scans were accumulated and averaged, a 200  $\mu\text{m}$  pathlength BaF<sub>2</sub> cell was employed. The region between 1800 and 2400  $\text{cm}^{-1}$  has been calibrated by running the spectra of (3R)-methylcyclopentanone-d<sub>4</sub><sup>52</sup>.

#### 4. NOE structure analysis

The spin-lattice relaxation times ( $T_1$ ) were measured at 300 K, after the analysis of the NOE build-up curves the mixing time ( $\tau_m$ ) (Figure 2SI) was chosen at 1.3 s as a mean value between the aliphatic and the aromatic moieties and sufficiently apart of the NOE maximum enhancement. For a first order multispin system the peak intensities are given by

$$I = M^0 \exp(-R \tau_m) \quad (1)$$

Using the matrix method equation<sup>53</sup> (1) could be solved as

$$R = -\tau_m^{-1} \ln A = -\tau_m^{-1} X(\ln A) X^{-1} \quad (2)$$

in the fast tumbling regime,  $\sigma_{ij} = k r_{ij}^{-6}$  and  $k$  is  $k = \left(\frac{\mu_0}{4\pi}\right)^2 \frac{\hbar^2 \gamma^4}{10} \left(\frac{6\tau_c}{1 + 4\omega^2 \tau_c^2} - \tau_c\right)$  since  $k$  relate to parameters fixed for a given experiment and assuming  $\tau_c$  comparable for each spin pair, than the internuclear distance  $r_{ij}$  could be estimated using a reference known distance ( $r_{ref}$ ) as

$$r_{ij} = r_{ref} \sqrt[6]{\frac{\sigma_{ref}}{\sigma_{ij}}} \quad (3)$$

As reference distance were used the reported distance for germinal proton (1.68 Å) considering the cross-peak between H<sub>6</sub> and H<sub>7</sub>. The obtained values were compared to them obtained in crystallographic data, referring to the rigid moieties of the complexes they fit well with an average absolute error of 3.7% (0.09 Å) with a standard deviation of 2.4% (0.05 Å). For what concerned the distances between different moieties all the  $\langle r_{ij} \rangle$  were increased by 10% in order to correct for overestimation of the short distances<sup>54</sup>.

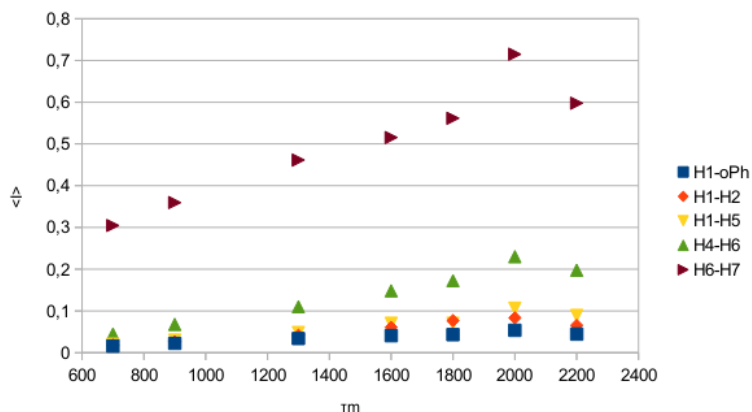

Figure 2SI. Build-up curves for selected cross-peaks of S<sub>Ru</sub>.

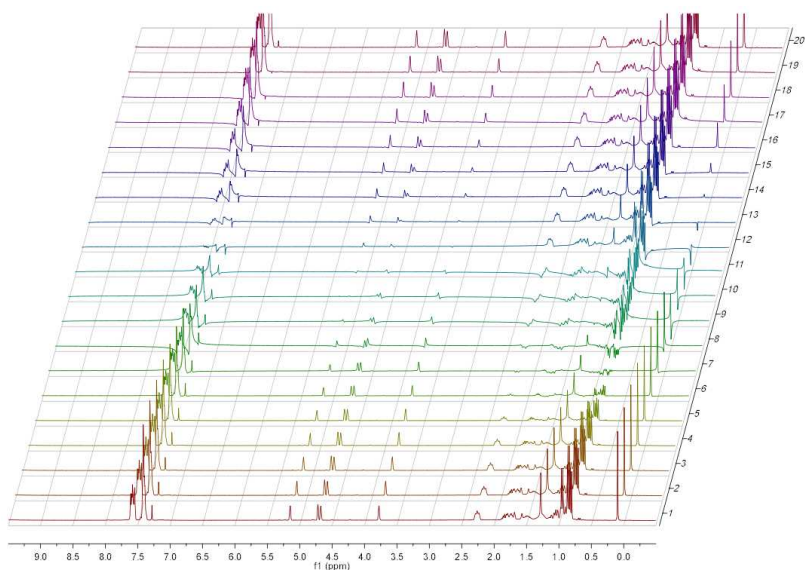

Figure 3SI. t1 determination for  $S_{Ru}$ .

#### 4.1 Intensity matrices

Table 1SI. the matrix of peak intensities of  $(S)_{Ru}$

|                    | oPh <sup>[a]</sup> | mPh <sup>[a]</sup> | H <sub>1</sub> | H <sub>4</sub> | H <sub>2</sub> | H <sub>3</sub> | H <sub>5</sub> | H <sub>7</sub> | H <sub>17</sub> | H <sub>12</sub> | H <sub>8</sub> | C <sub>10</sub> <sup>[b]</sup> | H <sub>6</sub> | H <sub>13</sub> | C <sub>15</sub> <sup>[b]</sup> |
|--------------------|--------------------|--------------------|----------------|----------------|----------------|----------------|----------------|----------------|-----------------|-----------------|----------------|--------------------------------|----------------|-----------------|--------------------------------|
| oPh <sup>[a]</sup> | 107,11             | 9,72               | 0,58           | 0,13           | 0,77           | 0,75           | 0              | 0,04           | 0               | 0               | 0              | 0                              | 0              | 0               | 0                              |
| mPh <sup>[a]</sup> | 3,77               | 159,89             | 0              | 0              | 0              | 0              | 0              | 0              | 0               | 0               | 0              | 0                              | 0              | 0               | 0                              |
| H <sub>1</sub>     | 0,67               | 0                  | 17,45          | 0              | 0,84           | 0              | 0,5            | 0              | 0,55            | 0               | 0              | 0                              | 0              | 0               | 0,5                            |
| H <sub>4</sub>     | 0,16               | 0                  | 0              | 15,81          | 0              | 0,82           | 0              | 0,04           | 0,06            | 0               | 0              | 0                              | 0,97           | 0               | 0                              |
| H <sub>2</sub>     | 0,96               | 0                  | 0,83           | 0              | 16,88          | 0,81           | 0              | 0              | 0,03            | 0               | 0              | 0                              | 0              | 0               | 0                              |
| H <sub>3</sub>     | 0,75               | 0                  | 0              | 0,83           | 0,81           | 16,57          | 0              | 0              | 0               | 0               | 0              | 0                              | 0              | 0               | 0                              |
| H <sub>5</sub>     | 0                  | 0                  | 0,51           | 0              | 0              | 0              | 8,53           | 0              | 0               | 0               | 0              | 0                              | 0              | 0               | 0,45                           |
| H <sub>7</sub>     | 0,04               | 0                  | 0              | 0,05           | 0              | 0              | 0              | 8,53           | 0               | 0               | 1,47           | 0                              | 3,44           | 0               | 0                              |
| H <sub>17</sub>    | 0                  | 0                  | 0,53           | 0,09           | 0,03           | 0              | 0              | 0              | 9,43            | 0               | 0              | 0                              | 0              | 0               | 1,14                           |
| H <sub>12</sub>    | 0                  | 0                  | 0              | 0              | 0              | 0              | 0              | 0              | 0               | 9,43            | 0,22           | 0                              | 0              | 3,23            | 0                              |
| H <sub>8</sub>     | 0                  | 0                  | 0              | 0              | 0              | 0              | 0              | 1,08           | 0               | 0,43            | 12,14          | 0,53                           | 0              | 0               | 0                              |
| C <sub>10</sub>    | 0                  | 0                  | 0              | 0              | 0              | 0              | 0              | 0              | 0               | 0               | 0,47           | 19,44                          | 0              | 0               | 0                              |
| H <sub>6</sub>     | 0                  | 0                  | 0              | 0,89           | 0              | 0              | 0              | 3,5            | 0               | 0               | 0              | 0                              | 7,85           | 0               | 0                              |
| H <sub>13</sub>    | 0                  | 0                  | 0              | 0              | 0              | 0              | 0              | 0              | 0               | 3,66            | 0              | 0                              | 0              | 7,85            | 0                              |
| C <sub>15</sub>    | 0                  | 0                  | 0,57           | 0              | 0              | 0              | 0,45           | 0              | 1,47            | 0               | 0              | 0                              | 0              | 0               | 23,55                          |

Table 2SI. the matrix of peak intensities of  $(R)_{Ru}$

|                | oPh    | mPh    | H <sub>1</sub> | H <sub>2</sub> | H <sub>3</sub> | H <sub>4</sub> | H <sub>7</sub> | H <sub>5</sub> | H <sub>17</sub> | H <sub>8</sub> | H <sub>6</sub> | C <sub>15</sub> |
|----------------|--------|--------|----------------|----------------|----------------|----------------|----------------|----------------|-----------------|----------------|----------------|-----------------|
| oPh            | 130,09 | 5,26   | 0,22           | 0,81           | 0,9            | 0,67           | 0,16           | 0              | 0               | 0              | 0              | 0               |
| mPh            | 4,79   | 163,94 | 0,01           | 0,08           | 0,08           | 0,04           | 0              | 0              | 0               | 0              | 0              | 0               |
| H <sub>1</sub> | 0,22   | 0,02   | 16,1           | 0,78           | 0              | 0              | 0              | 0              | 0               | 0              | 1,01           | 0               |
| H <sub>2</sub> | 0,81   | 0,07   | 0,75           | 17,69          | 0,68           | 0              | 0              | 0              | 0               | 0              | 0              | 0               |

|                 |      |      |      |      |       |       |      |       |       |       |       |       |
|-----------------|------|------|------|------|-------|-------|------|-------|-------|-------|-------|-------|
| H <sub>3</sub>  | 0,86 | 0,1  | 0    | 0,68 | 16,32 | 0,67  | 0    | 0     | 0     | 0     | 0     | 0     |
| H <sub>4</sub>  | 0,61 | 0,06 | 0    | 0    | 0,67  | 14,71 | 0    | 0,62  | 0,78  | 0     | 0     | 0,53  |
| H <sub>7</sub>  | 0,16 | 0    | 0    | 0    | 0     | 0     | 8,54 | 0,59  | 0     | 0,8   | 2,91  | 0     |
| H <sub>5</sub>  | 0    | 0    | 0    | 0    | 0     | 0,65  | 0,61 | 19,21 | 0     | 0,8   | 0     | 0,75  |
| H <sub>17</sub> | 0    | 0    | 0    | 0    | 0     | 0,78  | 0    | 0     | 15,04 | 0     | 0     | 0,82  |
| H <sub>8</sub>  | 0    | 0    | 0    | 0    | 0     | 0     | 0,84 | 0,8   | 0     | 21,03 | 0     | 0     |
| H <sub>6</sub>  | 0    | 0    | 0,95 | 0    | 0     | 0     | 2,88 | 0     | 0     | 0     | 11,79 | 0     |
| C <sub>15</sub> | 0    | 0    | 0    | 0    | 0     | 0,52  | 0    | 0,8   | 0,085 | 0     | 0     | 22,95 |

## 5. NMR spectra

### 5.1. T-4-S- $\eta^5$ -[(1R,2S,5R)-menthyl]-C<sub>5</sub>H<sub>4</sub>)Ru(CO)(P(C<sub>6</sub>H<sub>5</sub>)<sub>3</sub>)Cl] ((S)<sub>Ru</sub>)

#### 5.1.1. <sup>1</sup>H-NMR

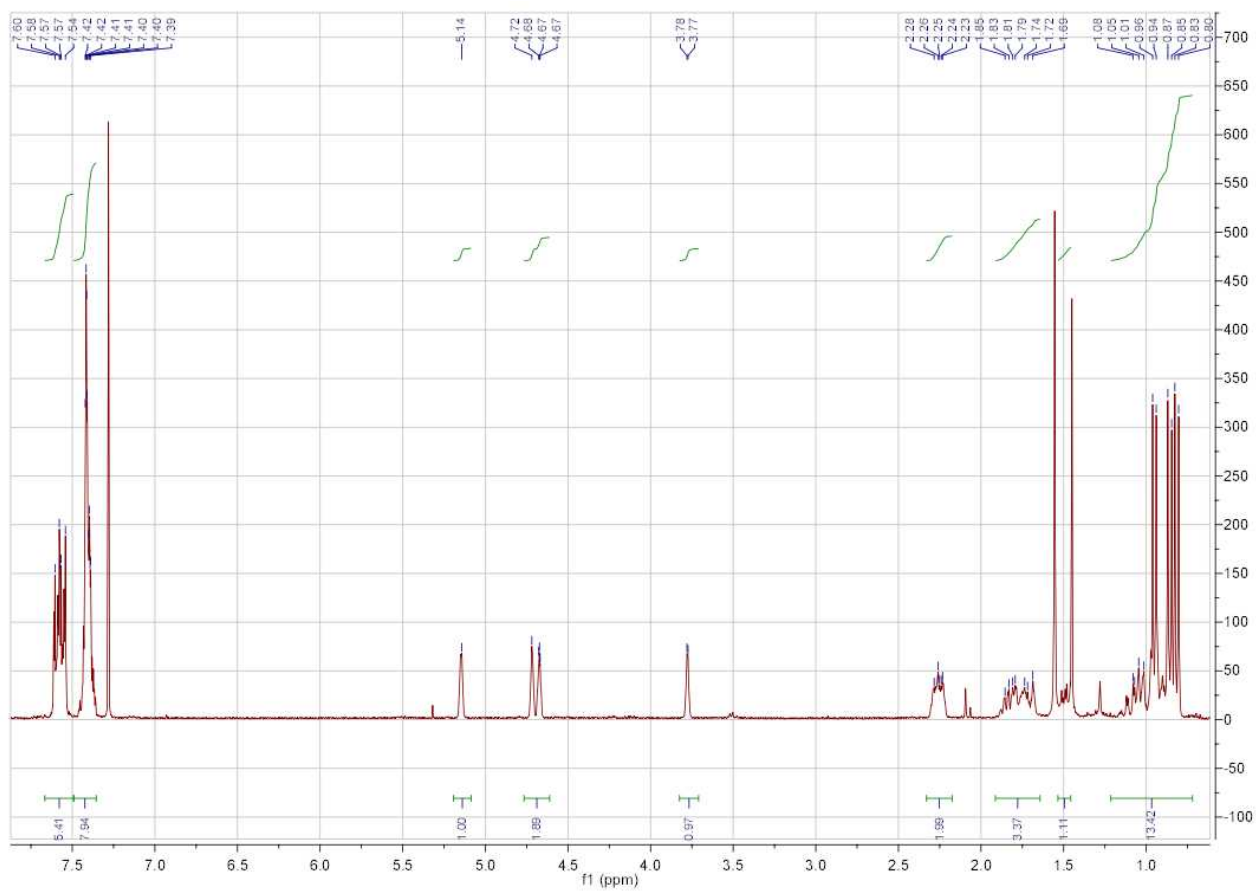

Figure 5S1. <sup>1</sup>H-NMR spectrum (300 MHz) of (S)<sub>Ru</sub> in CDCl<sub>3</sub> at 300 K.

#### 5.1.2. <sup>31</sup>P-NMR

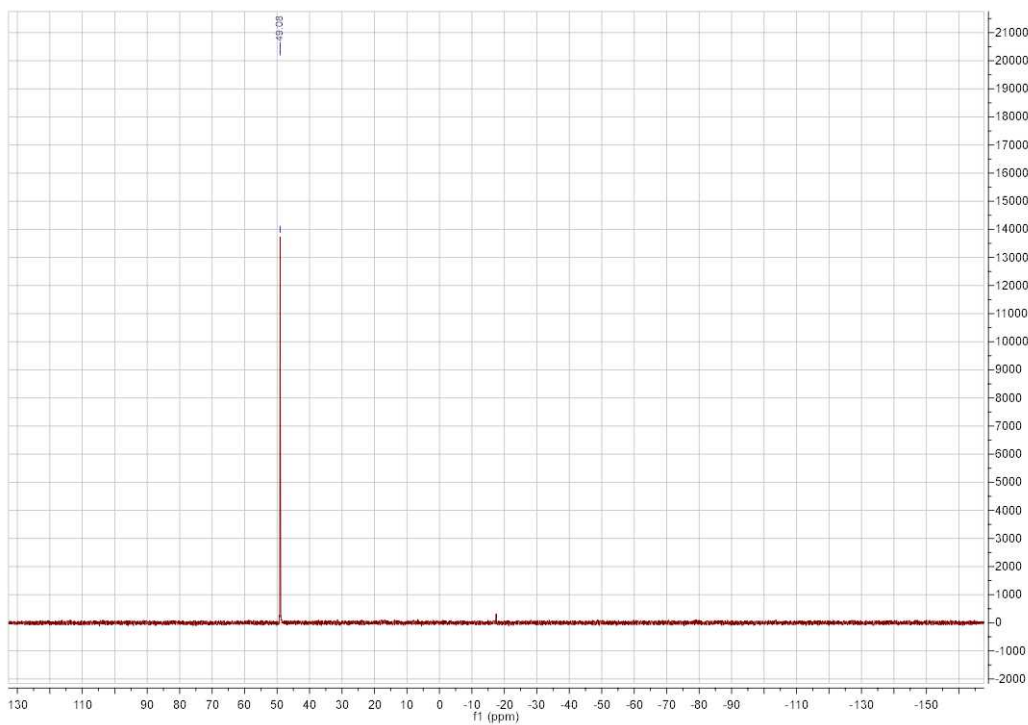

Figure 6S1. <sup>31</sup>P-NMR spectrum (121.49 MHz) of (S)<sub>Ru</sub> in CDCl<sub>3</sub> at 300 K.

5.1.3.  $^{13}\text{C-NMR}$

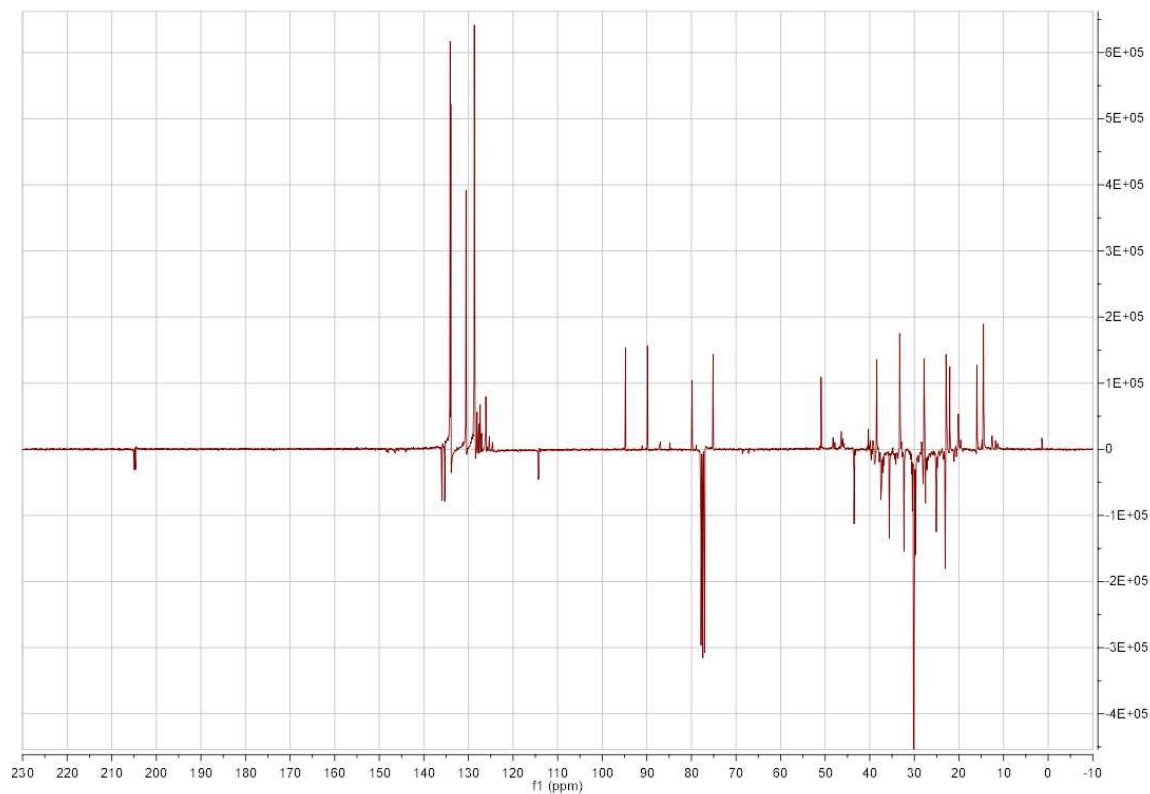

Figure 7SI.  $^{13}\text{C-NMR}$  spectrum (75.47 MHz) of  $(\text{S})_{\text{Ru}}$  in  $\text{CDCl}_3$  at 300 K.

5.1.4. COSY

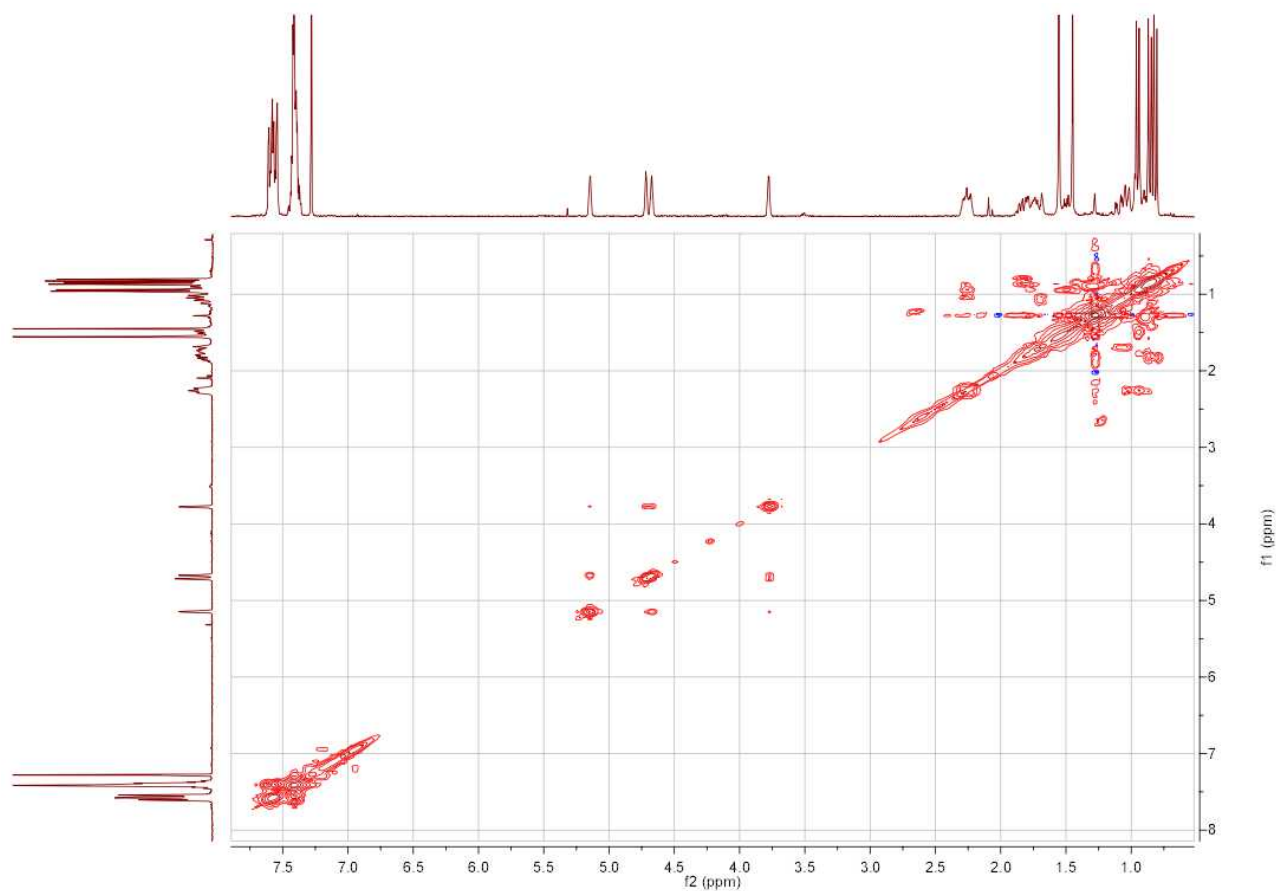

Figure 8SI. COSYGPQF spectrum (300 MHz) of  $(\text{S})_{\text{Ru}}$  in  $\text{CDCl}_3$  at 300 K.



5.1.5. HSQC

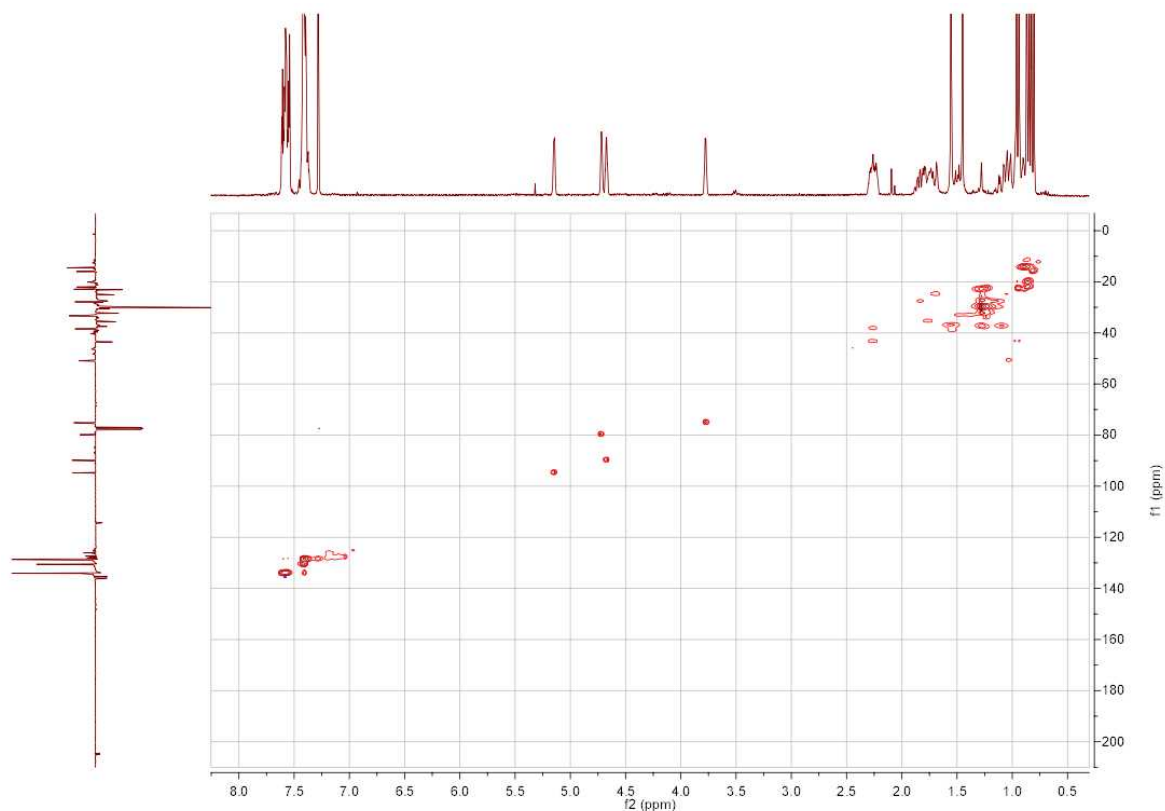

Figure 9SI. HSQCetgpsi  $^{13}\text{C}$ - $^1\text{H}$  spectrum of (*S*)<sub>Ru</sub> in  $\text{CDCl}_3$  at 300 K.

5.1.6. HMBC

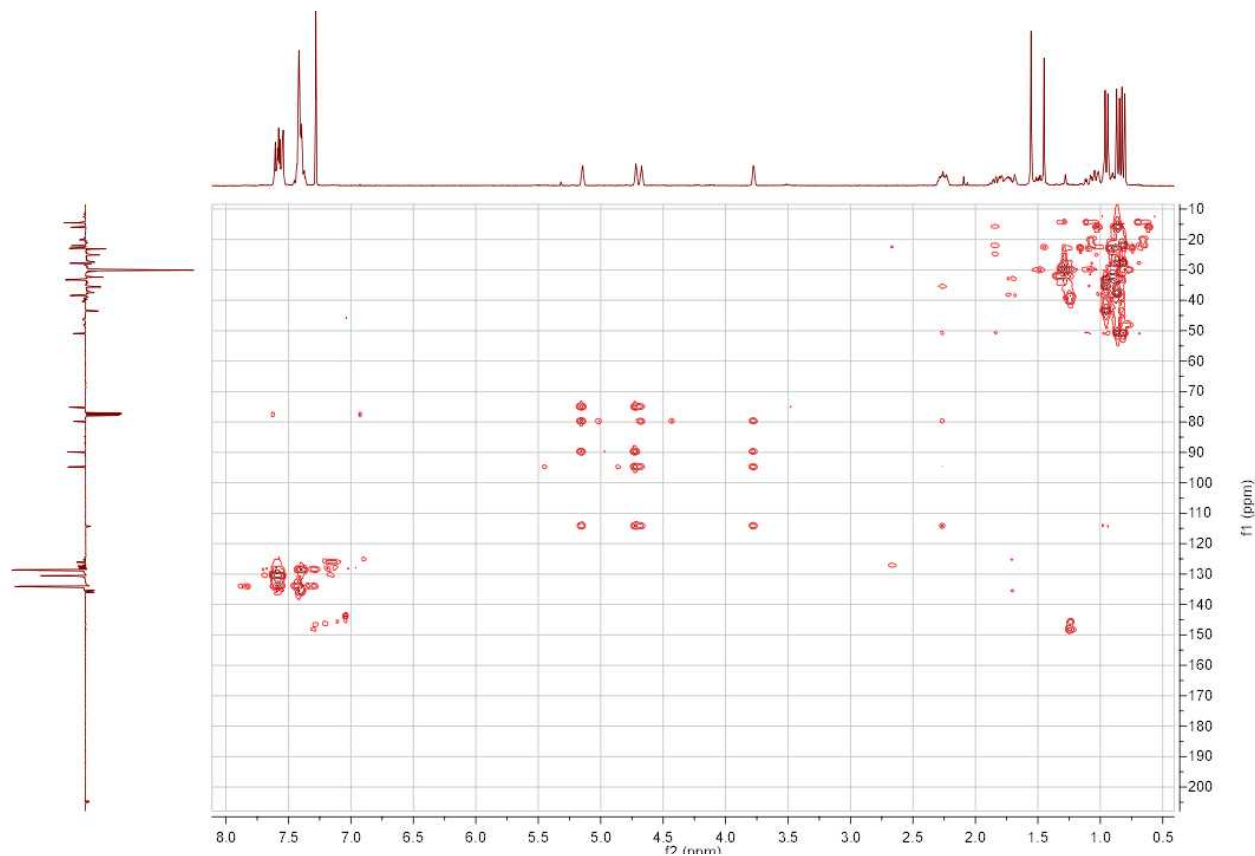

Figure 10SI. HMBC long range  $^{13}\text{C}$ - $^1\text{H}$  spectrum of (*S*)<sub>Ru</sub> in  $\text{CDCl}_3$  at 300 K.

5.1.7. <sup>31</sup>P-INVBT

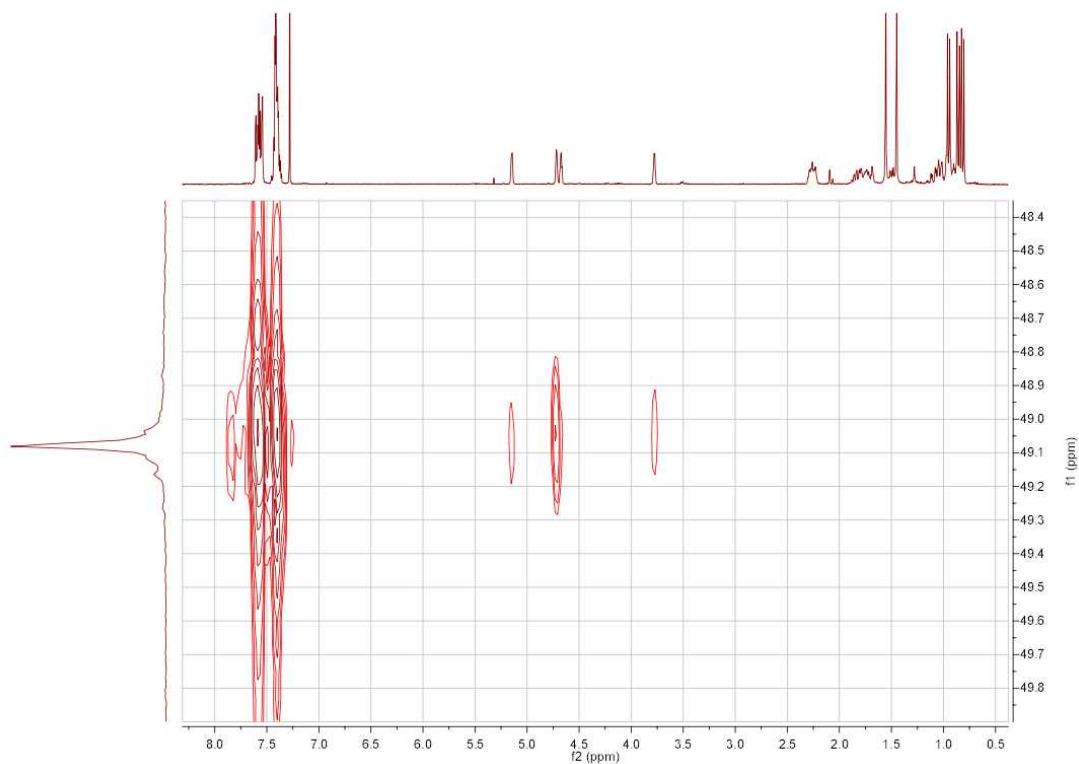

Figure 11SI. <sup>31</sup>P-INVBT spectrum of (S)<sub>Ru</sub> in CDCl<sub>3</sub> at 300 K.

5.1.8. NOESYGPPH mixingtime=1.3 s d1=3 s

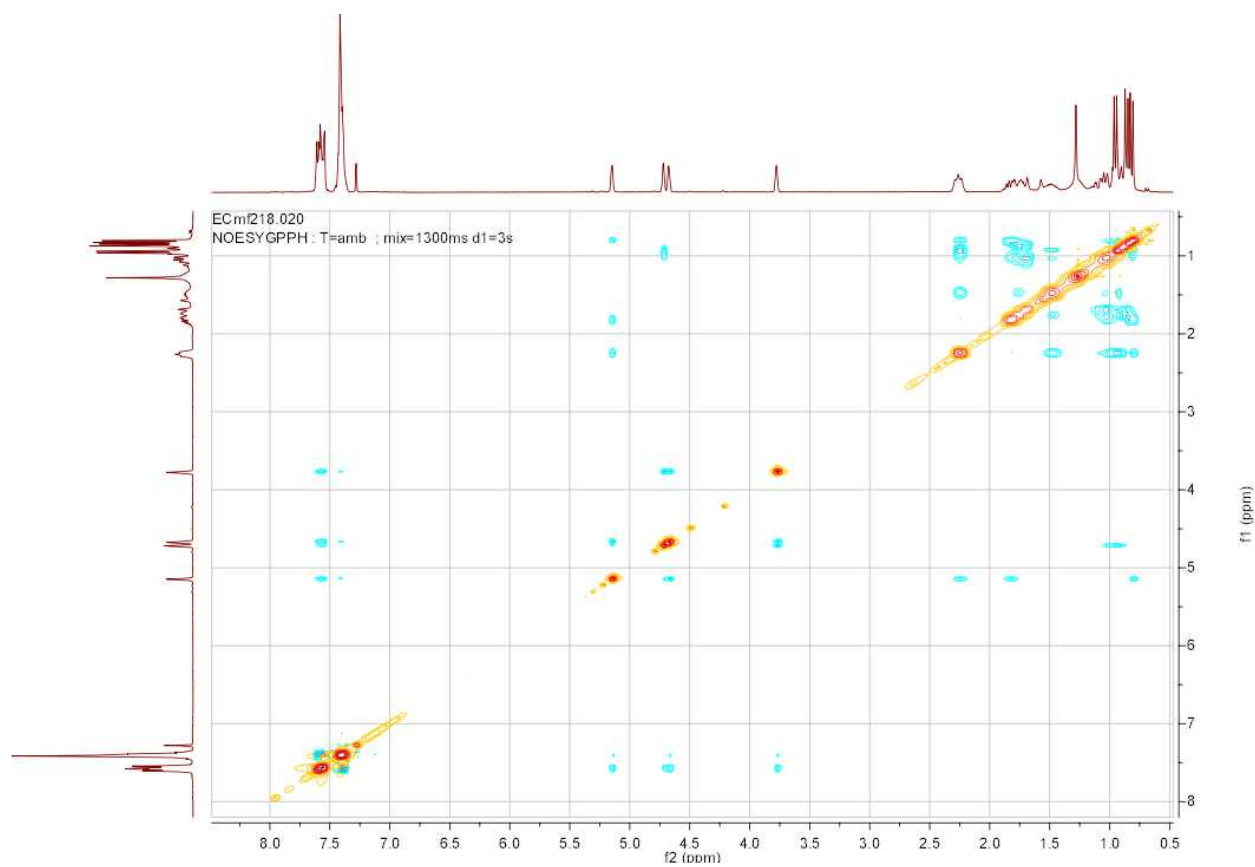

Figure 12SI. NOESY spectrum (300 MHz, mixing time: 1.3 s, time delay 3 s) of (S)<sub>Ru</sub> in CDCl<sub>3</sub> at 300 K.

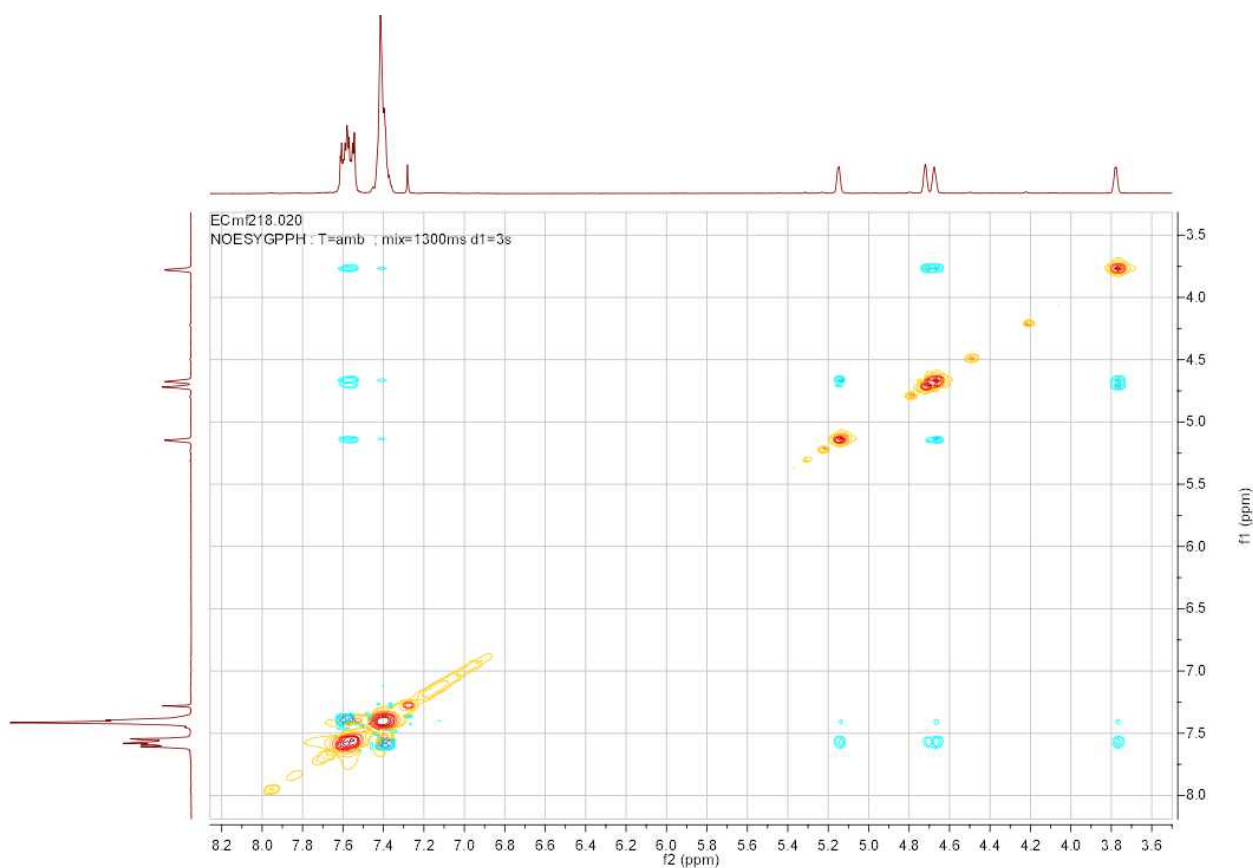

Figure 13SI. NOESY of (R)<sub>Ru</sub> : expansion from 8.5ppm to 3.5ppm.

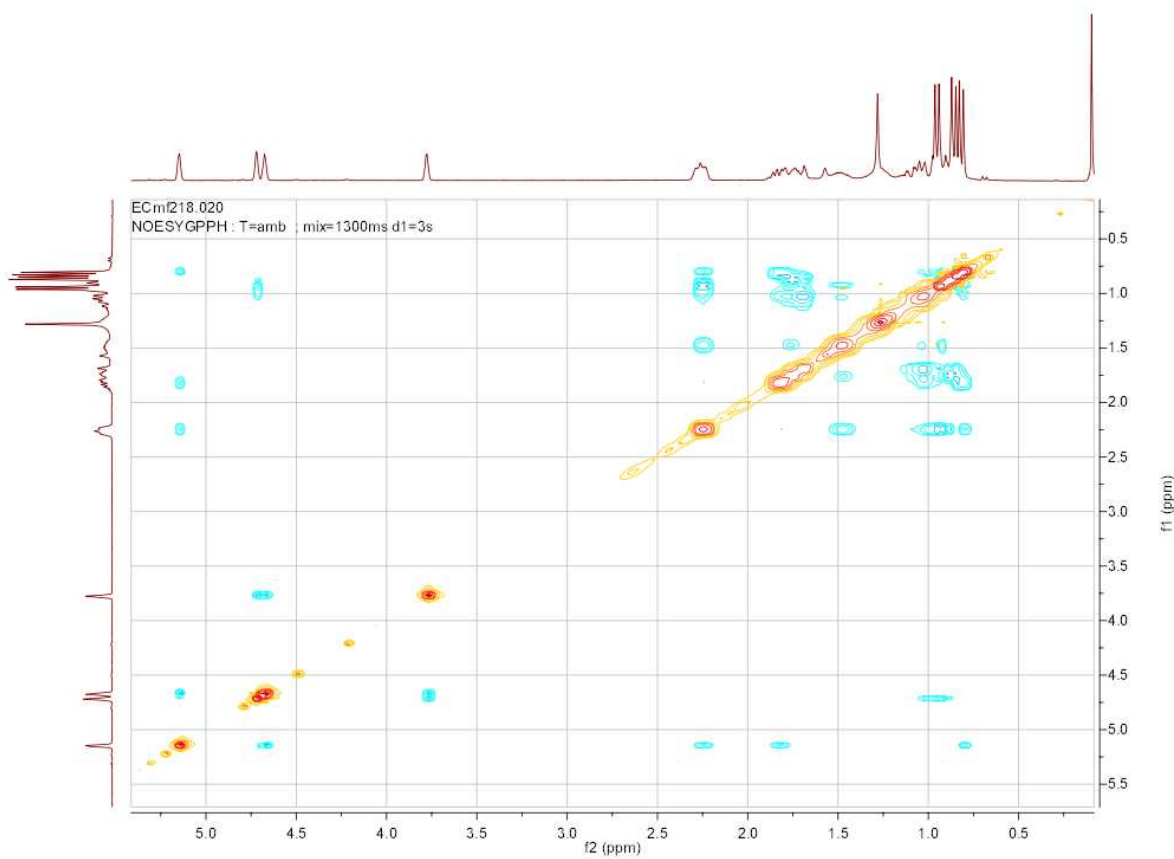

Figure 14SI. NOESY of (R)<sub>RU</sub> : expansion from 6ppm to 0ppm.

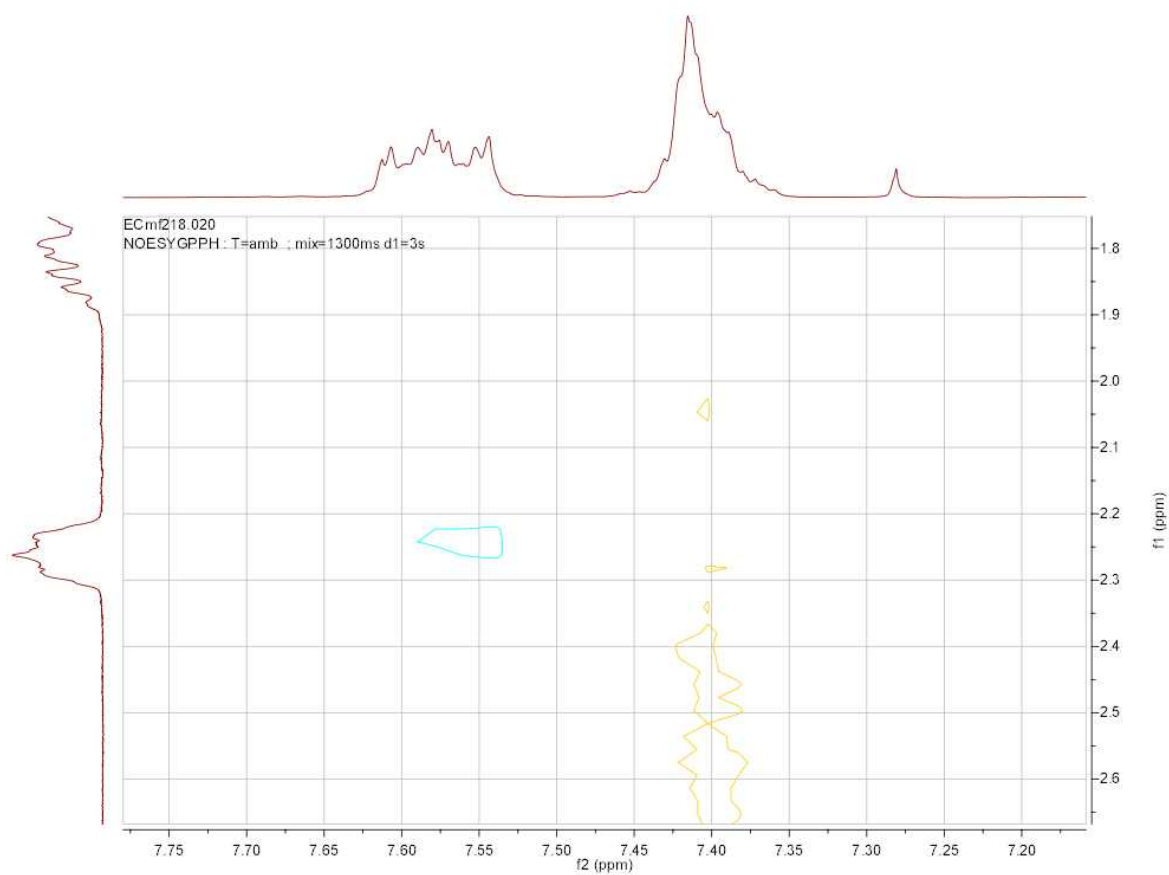

Figure 15SI. NOESY of (R)<sub>RU</sub> cross-peak between oPh and H<sub>7</sub>.

5.2. T-4-R- $\eta^5$ -[(1R,2S,5R)-menthyl]-C<sub>5</sub>H<sub>4</sub>Ru(CO)(P(C<sub>6</sub>H<sub>5</sub>)<sub>3</sub>)Cl ((R)<sub>Ru</sub>)

5.2.1. <sup>1</sup>H-NMR

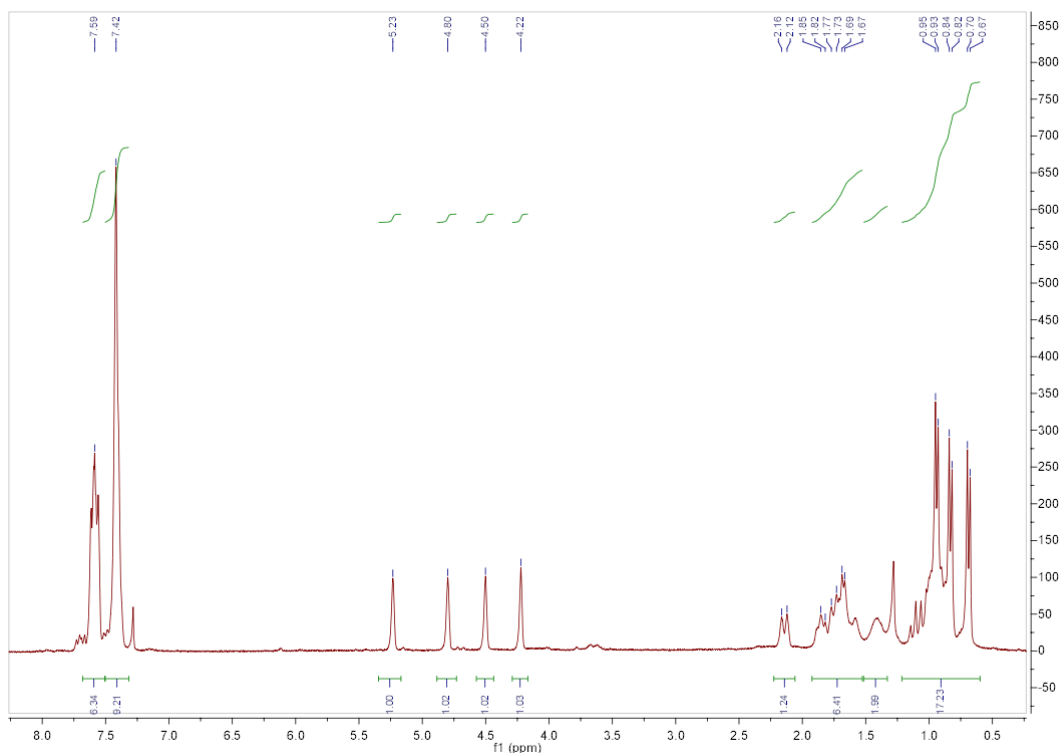

Figure 16SI. <sup>1</sup>H-NMR spectrum (300 MHz) of (R)<sub>Ru</sub> in CDCl<sub>3</sub> at 300 K.

5.2.2. <sup>31</sup>P-NMR

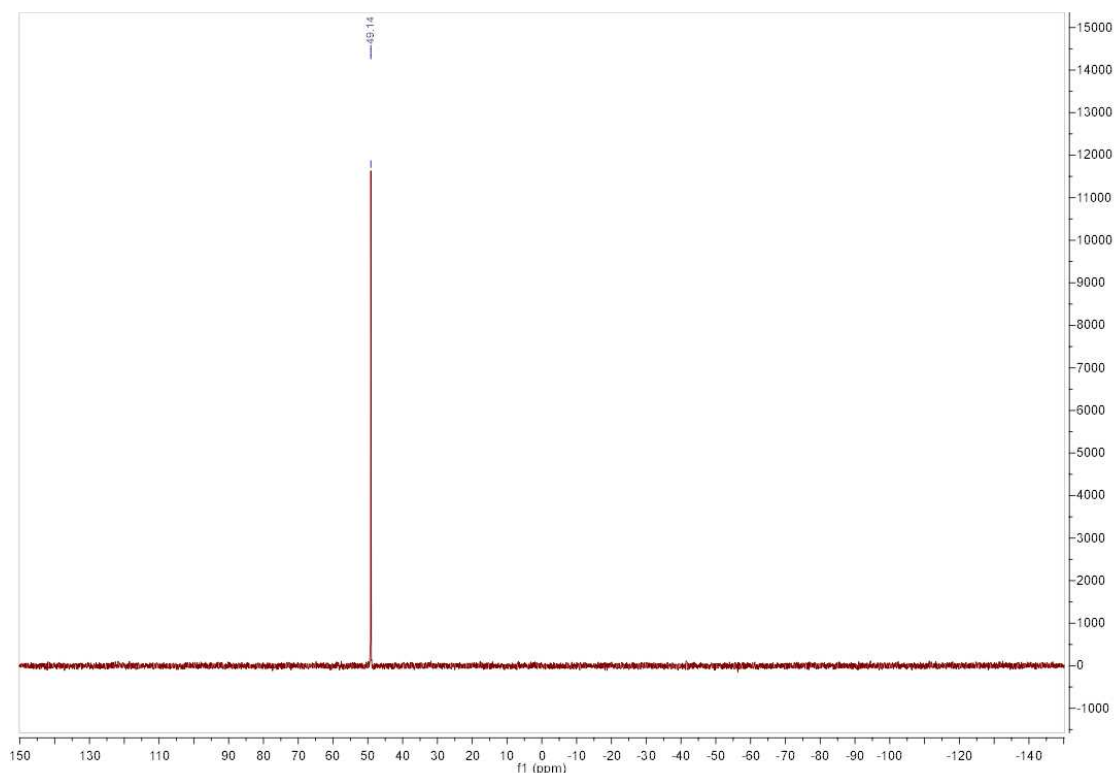

Figure 17SI. <sup>31</sup>P-NMR spectrum (121.49 MHz) of (R)<sub>Ru</sub> in CDCl<sub>3</sub> at 300 K.

5.2.3.  $^{13}\text{C-NMR}$

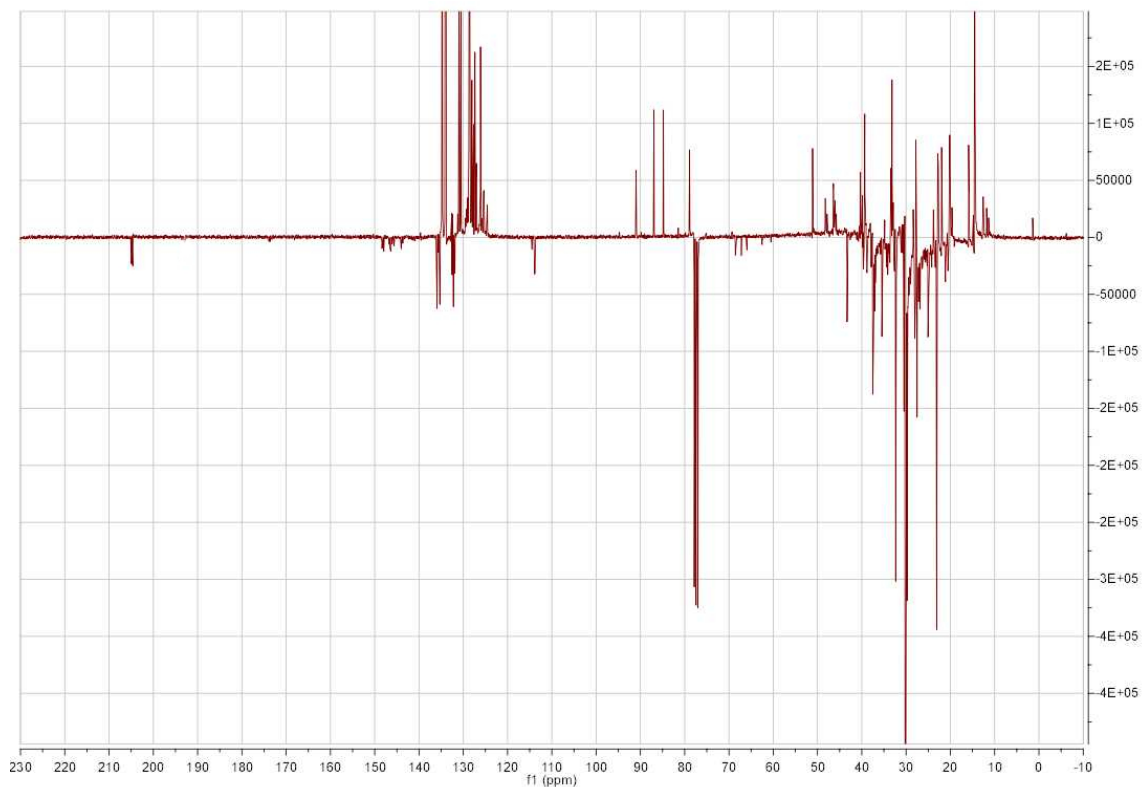

Figure 18SI.  $^{13}\text{C-NMR}$  spectrum (75.47 MHz) of  $(R)_{\text{Ru}}$  in  $\text{CDCl}_3$  at 300 K.

5.2.4. COSY

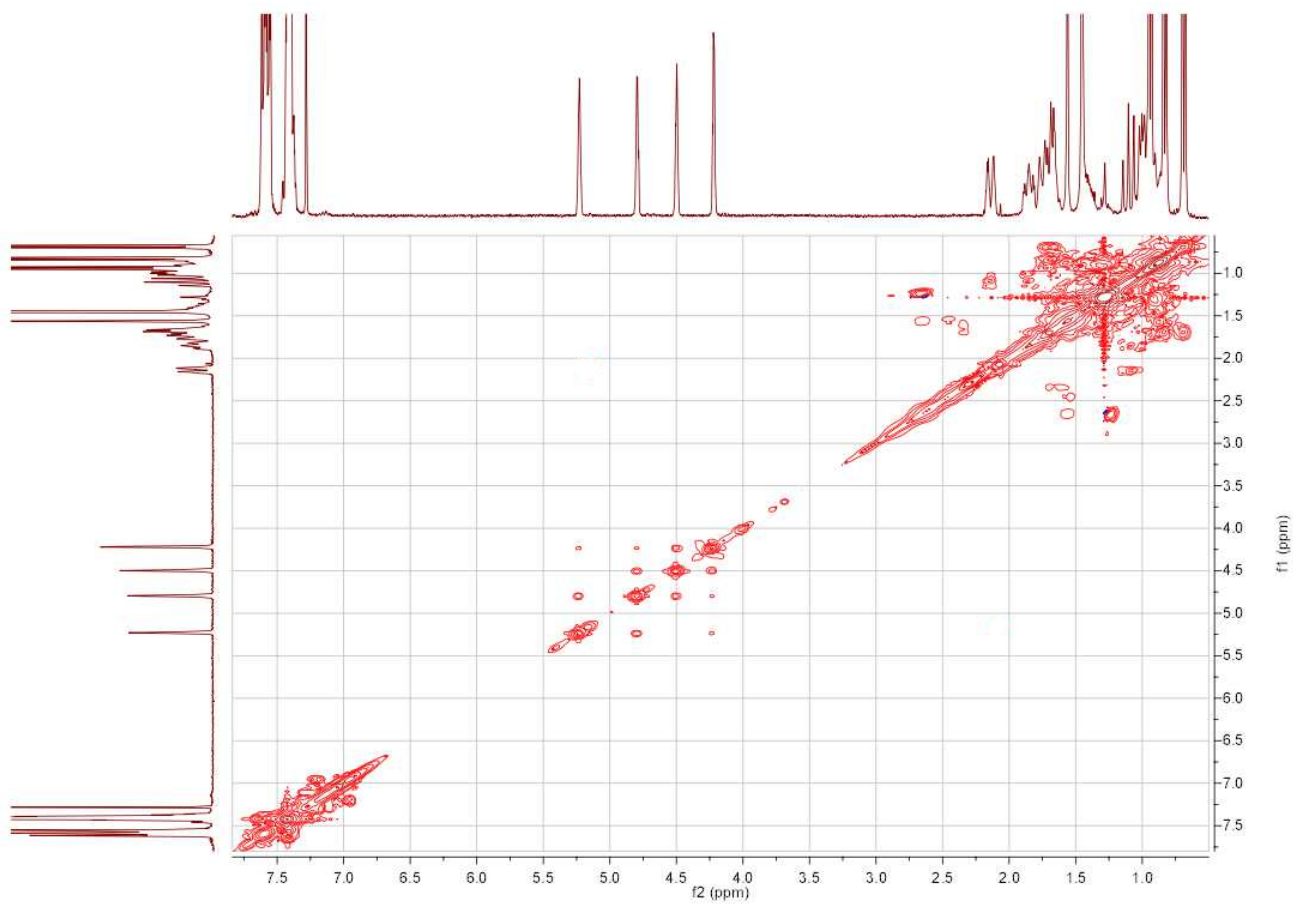

Figure 19SI. COSYGPQF spectrum (300 MHz) of  $(R)_{\text{Ru}}$  in  $\text{CDCl}_3$  at 300 K.

5.2.5. HSQC

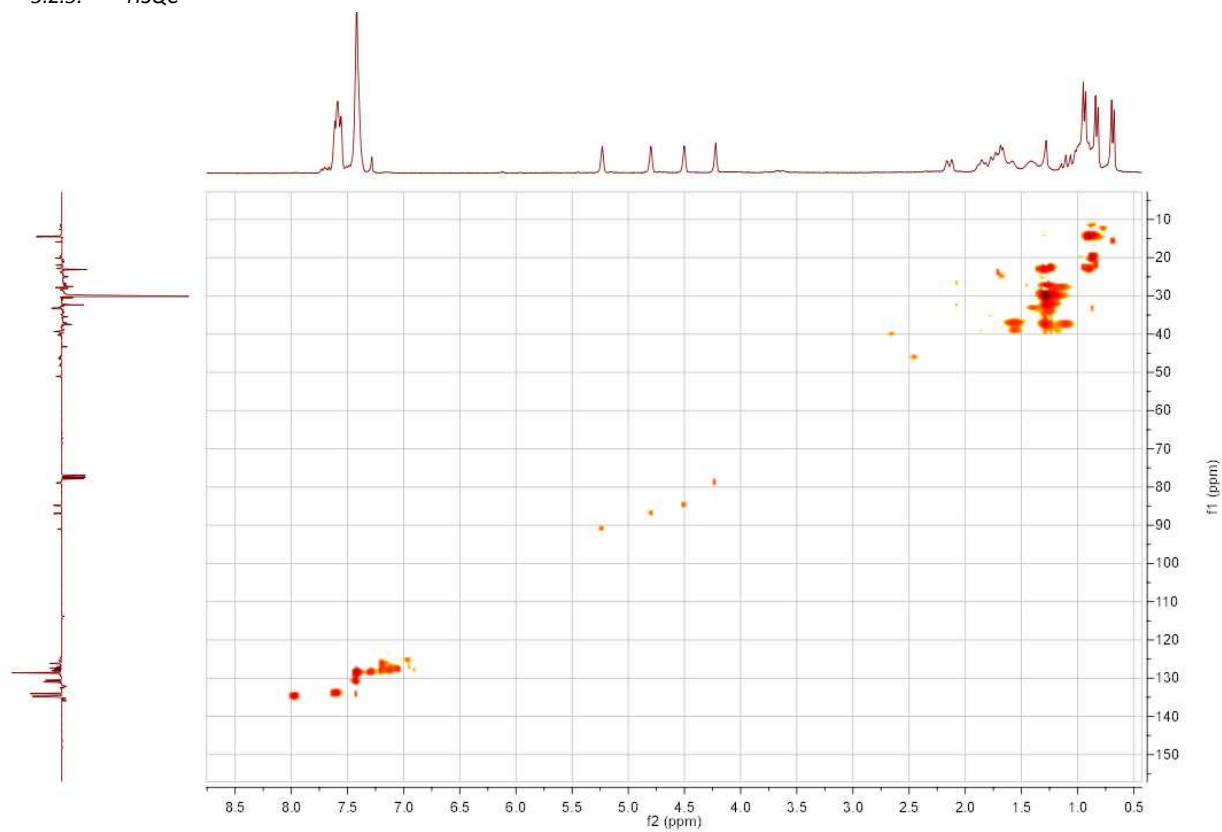

Figure 20SI. HSQCetgpsi  $^{13}\text{C}$ - $^1\text{H}$  spectrum of  $(R)_{\text{Ru}}$  in  $\text{CDCl}_3$  at 300 K.

5.2.6. HMBC

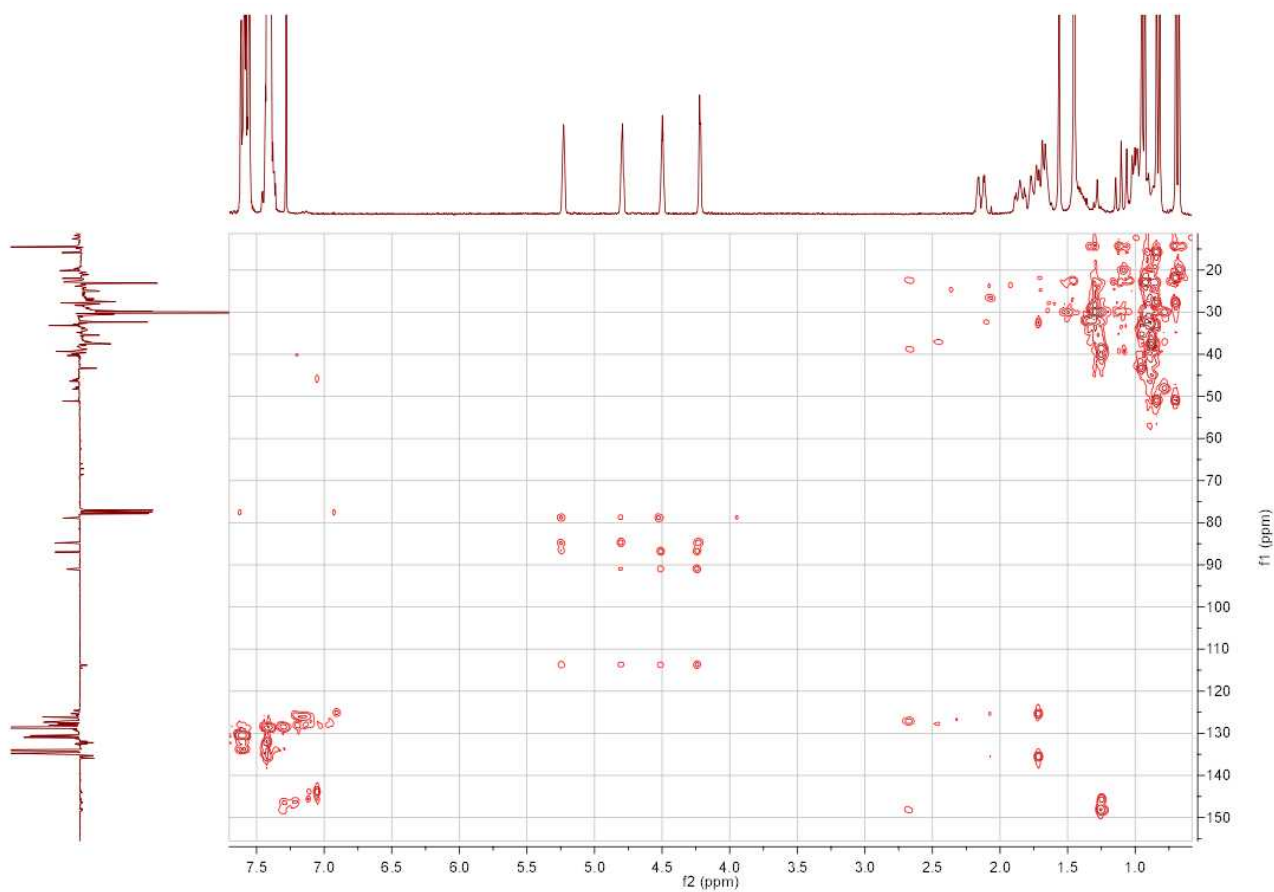

Figure 21SI. HMBC long range  $^{13}\text{C}$ - $^1\text{H}$  spectrum of  $(R)_{\text{Ru}}$  in  $\text{CDCl}_3$  at 300 K.

5.2.7. <sup>31</sup>P-INVBT

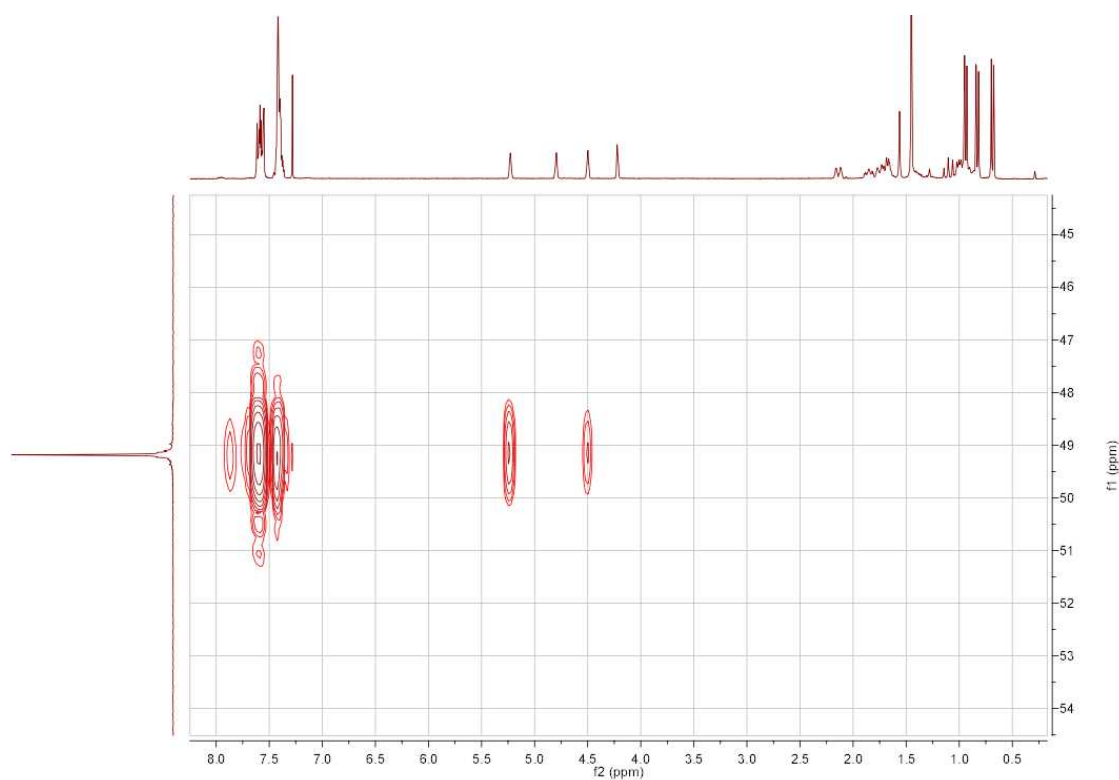

Figure 22SI. <sup>31</sup>P-INVBT spectrum of (R)<sub>Ru</sub> in CDCl<sub>3</sub> at 300 K.

5.2.8. NOESYGPPH mixingtime=1.3 s d1=3 s

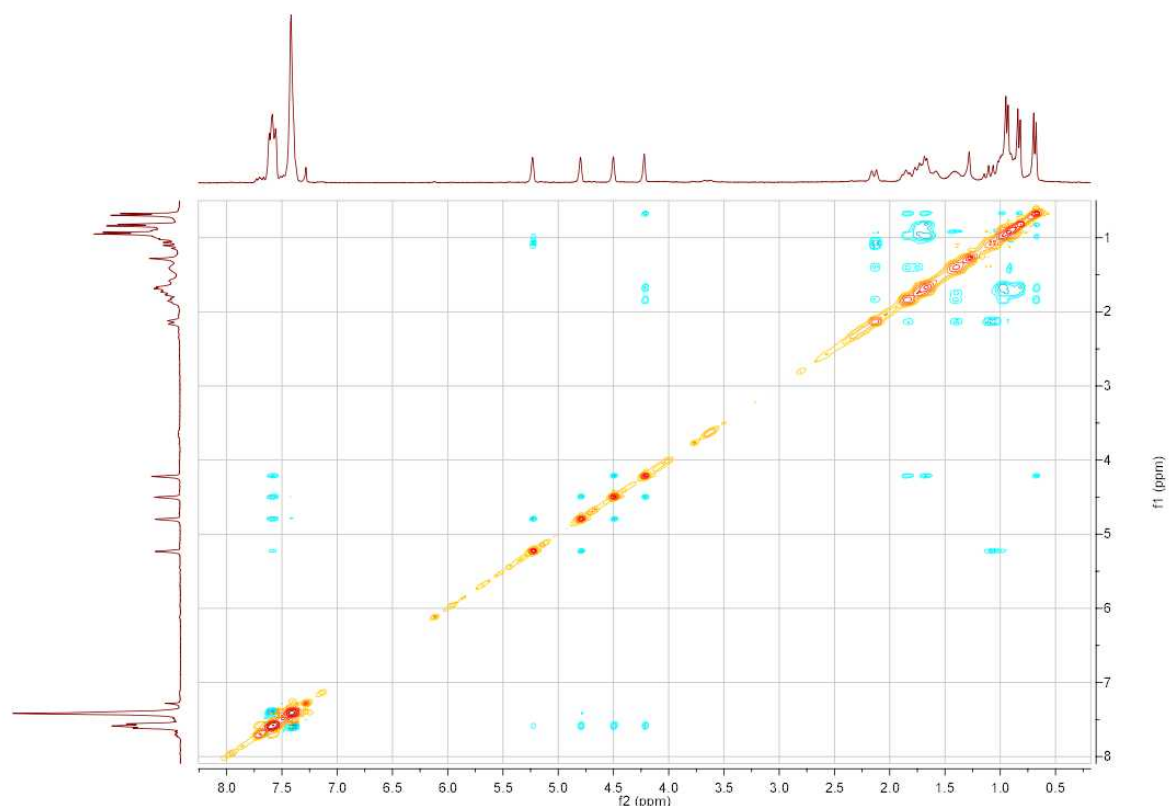

Figure 23SI. NOESY spectrum (300 MHz, mixing time: 1.3 s, time delay 3 s) of (R)<sub>Ru</sub> in CDCl<sub>3</sub> at 300 K.



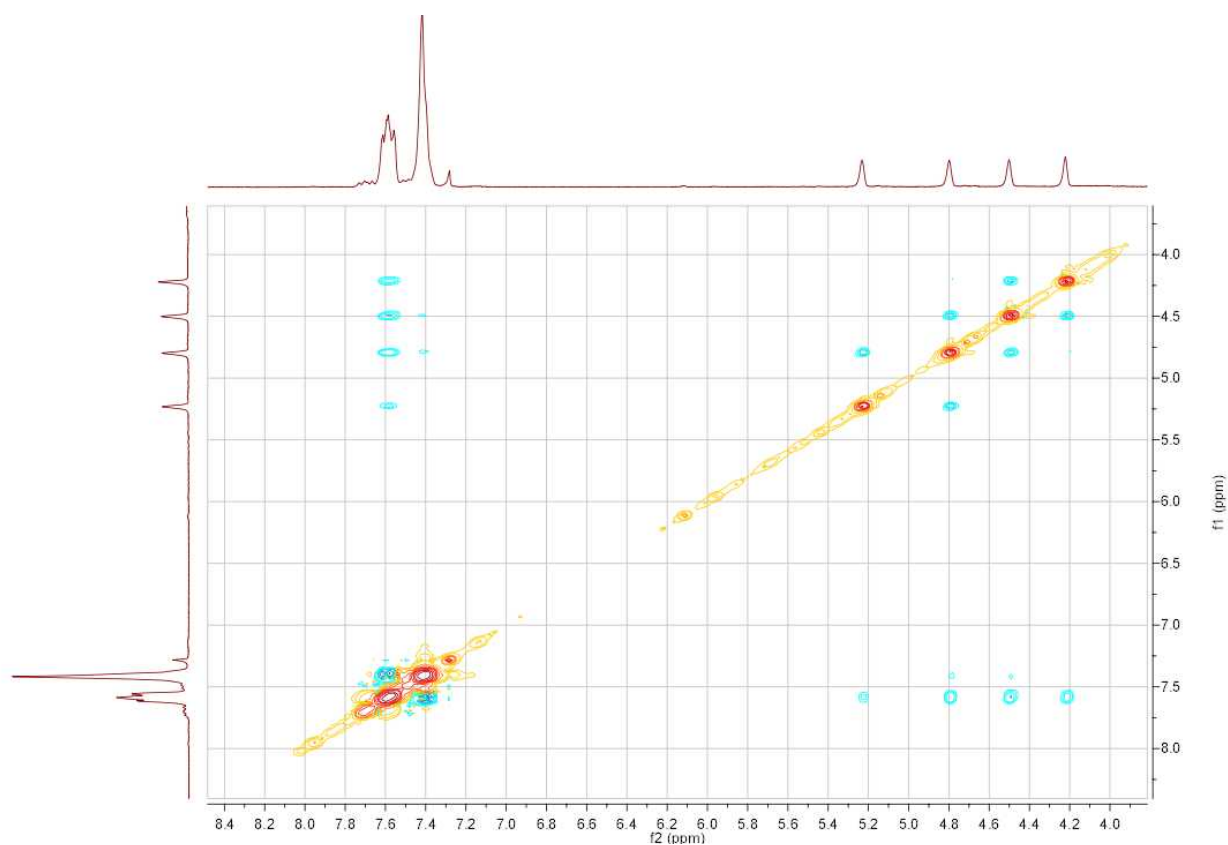

Figure 24SI. NOESY of (R)<sub>Ru</sub> : expansion from 8.5ppm to 4ppm.

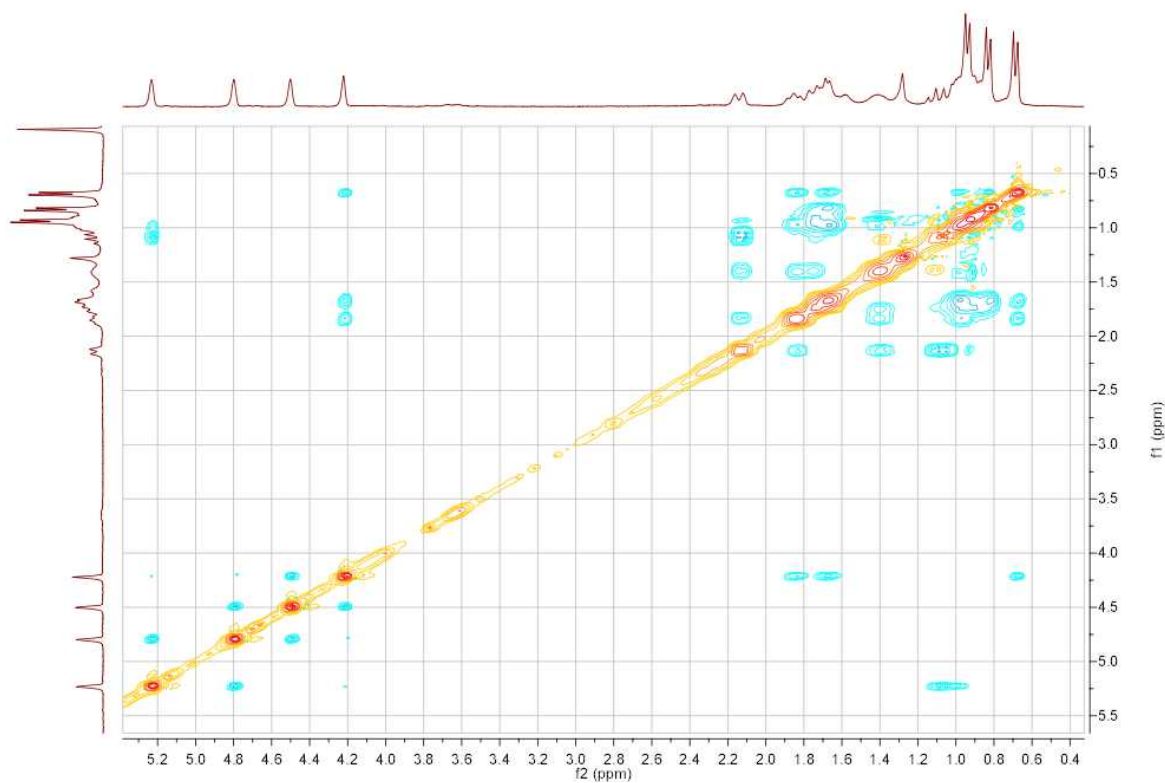

Figure 25SI. NOESY of (R)<sub>Ru</sub> : expansion from 5.5ppm to 0ppm.

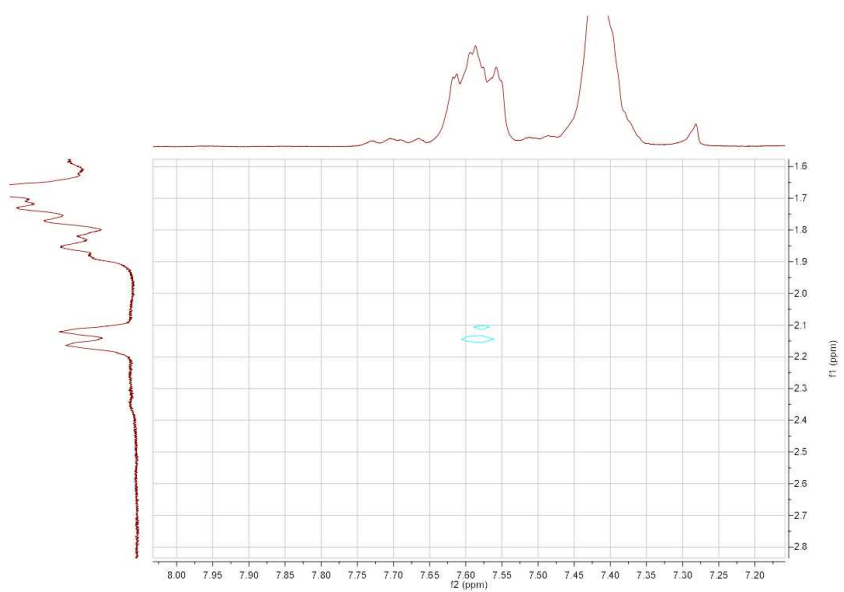

Figure 26SI. NOESY of (R)<sub>HU</sub> cross-peak between oPh and H<sub>7</sub>.

## 6. DFT CALCULATIONS

DFT calculations were conducted with Gaussian09<sup>55</sup>; the complex was treated in vacuo with a choice of functional and basis functions analogous to ref. <sup>56</sup>: B97D<sup>57</sup>/SVP<sup>58</sup>. The conformational search was carried out by first starting from the conformer of (*S*)<sub>Ru</sub> determined by x-ray, introducing a pseudo atom PSu at the center of the cyclopentadienyl ring, and drawing a line PSu-Ru around which the ring was rotated in five successive steps. For each one of the five positions thus reached, the menthyl moiety was allowed to rotate to avoid steric hindrance and the two orientations  $\sim 0^\circ$  and  $\sim 180^\circ$  of the menthyl moiety (referring to dihedral angle Ru-PSu-menthyl-isopropyl) have been tested. The lowest energy four conformers optimized at B97D<sup>[57]</sup>/SVP<sup>[58]</sup> level for both (*R*)<sub>Ru</sub> and (*S*)<sub>Ru</sub>, are shown in Figure 4SI and most representative distances are reported in Table 1.

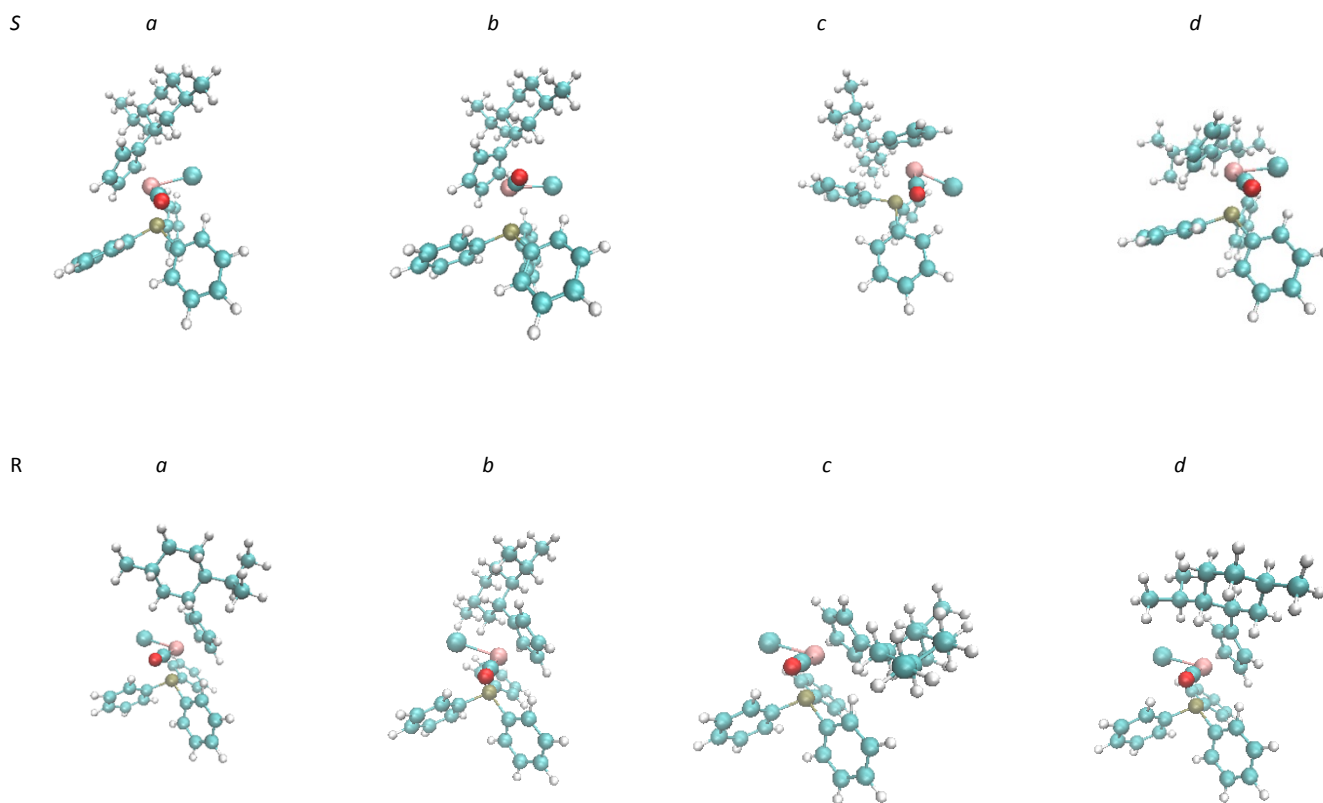

Figure 4SI. For each diastomers, (*S*)<sub>Ru</sub> and (*R*)<sub>Ru</sub>, the four structure relative to table 1 in the text are reported

## 7. DFT optimized geometries

### 7.1. (*S*)<sub>Ru</sub>

Coordinates of optimized structures of (*S*)<sub>Ru</sub> commented in the text (B97D/SVP level).

#### 7.1.1. (*S*) conformer a

Standard orientation:

| Center Number | Atomic Number | Atomic Type | Coordinates (Angstroms) |           |          |
|---------------|---------------|-------------|-------------------------|-----------|----------|
|               |               |             | X                       | Y         | Z        |
| 1             | 6             | 0           | -1.790209               | -0.005892 | 2.101861 |
| 2             | 1             | 0           | -2.221259               | 0.804210  | 2.693298 |
| 3             | 6             | 0           | -0.606240               | -0.762927 | 2.441778 |
| 4             | 6             | 0           | -0.388480               | -1.716256 | 1.389805 |
| 5             | 6             | 0           | -1.388530               | -1.516622 | 0.392286 |
| 6             | 1             | 0           | -0.018727               | -0.676040 | 3.358348 |

|    |    |   |           |           |           |
|----|----|---|-----------|-----------|-----------|
| 7  | 1  | 0 | 0.428235  | -2.441175 | 1.352619  |
| 8  | 1  | 0 | -1.496588 | -2.075544 | -0.537386 |
| 9  | 6  | 0 | -3.433471 | 0.108825  | 0.060024  |
| 10 | 6  | 0 | -4.746054 | -0.709925 | 0.271326  |
| 11 | 6  | 0 | -3.664158 | 1.599073  | 0.381687  |
| 12 | 6  | 0 | -5.872119 | -0.085025 | -0.581073 |
| 13 | 6  | 0 | -4.786204 | 2.212927  | -0.468625 |
| 14 | 6  | 0 | -6.082850 | 1.406245  | -0.278476 |
| 15 | 1  | 0 | -3.158246 | 0.051486  | -1.010083 |
| 16 | 1  | 0 | -5.025612 | -0.587231 | 1.340118  |
| 17 | 1  | 0 | -5.610897 | -0.199718 | -1.651970 |
| 18 | 1  | 0 | -6.815159 | -0.640345 | -0.419058 |
| 19 | 1  | 0 | -6.886659 | 1.817324  | -0.921762 |
| 20 | 1  | 0 | -6.421374 | 1.524239  | 0.773387  |
| 21 | 1  | 0 | -4.478068 | 2.119375  | -1.531516 |
| 22 | 1  | 0 | -2.717979 | 2.142341  | 0.212443  |
| 23 | 1  | 0 | -3.934537 | 1.706178  | 1.453696  |
| 24 | 6  | 0 | -4.579477 | -2.234754 | 0.026488  |
| 25 | 1  | 0 | -3.742933 | -2.568787 | 0.670525  |
| 26 | 6  | 0 | -4.213644 | -2.578828 | -1.428873 |
| 27 | 1  | 0 | -3.346573 | -1.993394 | -1.786983 |
| 28 | 1  | 0 | -3.965860 | -3.653913 | -1.523085 |
| 29 | 1  | 0 | -5.059909 | -2.370105 | -2.111350 |
| 30 | 6  | 0 | -5.821255 | -3.025955 | 0.475111  |
| 31 | 1  | 0 | -6.696609 | -2.802450 | -0.164888 |
| 32 | 1  | 0 | -5.633142 | -4.115460 | 0.412877  |
| 33 | 1  | 0 | -6.092245 | -2.781766 | 1.521039  |
| 34 | 6  | 0 | -4.980321 | 3.700028  | -0.146785 |
| 35 | 1  | 0 | -4.043086 | 4.266096  | -0.310263 |
| 36 | 1  | 0 | -5.772748 | 4.147420  | -0.778392 |
| 37 | 1  | 0 | -5.276885 | 3.830881  | 0.913937  |
| 38 | 6  | 0 | 0.432959  | 2.008445  | 1.324105  |
| 39 | 8  | 0 | 0.723695  | 2.980577  | 1.897661  |
| 40 | 15 | 0 | 2.033623  | -0.044070 | -0.137101 |
| 41 | 6  | 0 | 2.201824  | -1.037849 | -1.680818 |
| 42 | 6  | 0 | 3.476129  | -1.314483 | -2.222359 |
| 43 | 6  | 0 | 1.047217  | -1.530676 | -2.318213 |
| 44 | 6  | 0 | 3.592145  | -2.101998 | -3.378195 |
| 45 | 1  | 0 | 4.375779  | -0.910632 | -1.741681 |
| 46 | 6  | 0 | 1.168161  | -2.316754 | -3.477104 |
| 47 | 1  | 0 | 0.064357  | -1.256520 | -1.922033 |
| 48 | 6  | 0 | 2.437464  | -2.608033 | -4.004312 |
| 49 | 1  | 0 | 4.584587  | -2.316315 | -3.795295 |
| 50 | 1  | 0 | 0.265118  | -2.691668 | -3.975810 |
| 51 | 1  | 0 | 2.529388  | -3.219634 | -4.911277 |
| 52 | 6  | 0 | 2.884101  | -1.050398 | 1.157960  |
| 53 | 6  | 0 | 3.051386  | -0.462194 | 2.431988  |
| 54 | 6  | 0 | 3.271070  | -2.390302 | 0.959325  |
| 55 | 6  | 0 | 3.612456  | -1.200043 | 3.484177  |
| 56 | 1  | 0 | 2.738122  | 0.576446  | 2.596280  |
| 57 | 6  | 0 | 3.821250  | -3.132383 | 2.021523  |
| 58 | 1  | 0 | 3.140918  | -2.856966 | -0.023919 |
| 59 | 6  | 0 | 3.995409  | -2.540212 | 3.282689  |
| 60 | 1  | 0 | 3.747004  | -0.730507 | 4.467135  |
| 61 | 1  | 0 | 4.115667  | -4.177090 | 1.857833  |
| 62 | 1  | 0 | 4.426878  | -3.119568 | 4.108941  |
| 63 | 6  | 0 | 3.173398  | 1.380262  | -0.405689 |
| 64 | 6  | 0 | 2.662748  | 2.531745  | -1.043484 |
| 65 | 6  | 0 | 4.531841  | 1.332529  | -0.025536 |
| 66 | 6  | 0 | 3.511759  | 3.620045  | -1.300174 |
| 67 | 1  | 0 | 1.605993  | 2.567750  | -1.337509 |
| 68 | 6  | 0 | 5.373662  | 2.427640  | -0.283768 |
| 69 | 1  | 0 | 4.930528  | 0.445974  | 0.481881  |
| 70 | 6  | 0 | 4.865346  | 3.572032  | -0.922048 |
| 71 | 1  | 0 | 3.109299  | 4.513410  | -1.794585 |
| 72 | 1  | 0 | 6.428176  | 2.386129  | 0.018436  |
| 73 | 1  | 0 | 5.523274  | 4.428081  | -1.120389 |
| 74 | 6  | 0 | -2.265282 | -0.443421 | 0.829897  |
| 75 | 44 | 0 | -0.111966 | 0.397400  | 0.571230  |
| 76 | 17 | 0 | -0.701049 | 1.375242  | -1.618909 |

### 7.1.2. (S) conformer b

Standard orientation:

| Center Number | Atomic Number | Atomic Type | Coordinates (Angstroms) |           |           |
|---------------|---------------|-------------|-------------------------|-----------|-----------|
|               |               |             | X                       | Y         | Z         |
| 1             | 6             | 0           | 1.763118                | -0.635181 | -1.665248 |
| 2             | 1             | 0           | 2.134073                | -0.014251 | -2.484278 |
| 3             | 6             | 0           | 0.613313                | -1.503291 | -1.726657 |
| 4             | 6             | 0           | 0.492202                | -2.143294 | -0.438411 |
| 5             | 6             | 0           | 1.512021                | -1.631866 | 0.403779  |
| 6             | 1             | 0           | -0.012936               | -1.696773 | -2.599905 |
| 7             | 1             | 0           | -0.285906               | -2.856481 | -0.155122 |
| 8             | 1             | 0           | 1.657766                | -1.863833 | 1.460785  |
| 9             | 6             | 0           | 3.512854                | 0.067262  | 0.172951  |
| 10            | 6             | 0           | 4.850096                | -0.580141 | -0.300618 |
| 11            | 6             | 0           | 3.464718                | 1.560961  | -0.213057 |
| 12            | 6             | 0           | 6.037504                | 0.213929  | 0.283004  |
| 13            | 6             | 0           | 4.658214                | 2.351338  | 0.345849  |
| 14            | 6             | 0           | 5.980319                | 1.701258  | -0.099574 |
| 15            | 1             | 0           | 3.474178                | 0.016801  | 1.277766  |
| 16            | 1             | 0           | 4.878938                | -0.457405 | -1.405235 |
| 17            | 1             | 0           | 6.018699                | 0.125159  | 1.387906  |
| 18            | 1             | 0           | 6.991387                | -0.229952 | -0.058828 |
| 19            | 1             | 0           | 6.839831                | 2.245606  | 0.340636  |
| 20            | 1             | 0           | 6.068567                | 1.799755  | -1.202886 |
| 21            | 1             | 0           | 4.605968                | 2.283236  | 1.453708  |
| 22            | 1             | 0           | 2.516893                | 1.985207  | 0.160967  |
| 23            | 1             | 0           | 3.462338                | 1.652057  | -1.319874 |
| 24            | 6             | 0           | 4.928228                | -2.106124 | -0.023448 |
| 25            | 1             | 0           | 4.021445                | -2.553732 | -0.477505 |
| 26            | 6             | 0           | 4.911524                | -2.451443 | 1.475877  |
| 27            | 1             | 0           | 4.035693                | -2.012251 | 1.988310  |
| 28            | 1             | 0           | 4.876357                | -3.548540 | 1.620456  |
| 29            | 1             | 0           | 5.822007                | -2.075662 | 1.981414  |
| 30            | 6             | 0           | 6.140448                | -2.751120 | -0.718232 |
| 31            | 1             | 0           | 7.093500                | -2.400470 | -0.276577 |
| 32            | 1             | 0           | 6.110414                | -3.853091 | -0.613597 |
| 33            | 1             | 0           | 6.156264                | -2.507014 | -1.798617 |
| 34            | 6             | 0           | 4.579845                | 3.830215  | -0.054686 |
| 35            | 1             | 0           | 3.630295                | 4.283834  | 0.288765  |
| 36            | 1             | 0           | 5.420338                | 4.408662  | 0.376685  |
| 37            | 1             | 0           | 4.626165                | 3.933793  | -1.157841 |
| 38            | 6             | 0           | -0.026854               | 1.732344  | -1.205388 |
| 39            | 8             | 0           | -0.096572               | 2.685948  | -1.872871 |
| 40            | 15            | 0           | -2.094760               | -0.020384 | 0.058030  |
| 41            | 6             | 0           | -2.632177               | -0.832141 | 1.623556  |
| 42            | 6             | 0           | -3.996684               | -0.874347 | 1.982122  |
| 43            | 6             | 0           | -1.669940               | -1.434021 | 2.457101  |
| 44            | 6             | 0           | -4.394969               | -1.536070 | 3.154202  |
| 45            | 1             | 0           | -4.745255               | -0.385722 | 1.346143  |
| 46            | 6             | 0           | -2.072780               | -2.094033 | 3.630617  |
| 47            | 1             | 0           | -0.610743               | -1.350513 | 2.194779  |
| 48            | 6             | 0           | -3.433153               | -2.150106 | 3.977970  |
| 49            | 1             | 0           | -5.457207               | -1.567794 | 3.428901  |
| 50            | 1             | 0           | -1.318532               | -2.554853 | 4.281280  |
| 51            | 1             | 0           | -3.745411               | -2.662741 | 4.897064  |
| 52            | 6             | 0           | -2.799806               | -1.085884 | -1.275658 |
| 53            | 6             | 0           | -2.693326               | -0.627561 | -2.608319 |
| 54            | 6             | 0           | -3.344137               | -2.360729 | -1.024904 |
| 55            | 6             | 0           | -3.140362               | -1.427313 | -3.669743 |
| 56            | 1             | 0           | -2.254688               | 0.357521  | -2.811299 |
| 57            | 6             | 0           | -3.777123               | -3.167754 | -2.093930 |
| 58            | 1             | 0           | -3.432115               | -2.724739 | 0.005580  |
| 59            | 6             | 0           | -3.680129               | -2.703347 | -3.415262 |
| 60            | 1             | 0           | -3.062393               | -1.057638 | -4.700319 |
| 61            | 1             | 0           | -4.195173               | -4.161656 | -1.888408 |
| 62            | 1             | 0           | -4.021956               | -3.332139 | -4.247303 |
| 63            | 6             | 0           | -3.108189               | 1.516858  | -0.009796 |
| 64            | 6             | 0           | -2.605067               | 2.669841  | 0.632207  |
| 65            | 6             | 0           | -4.366530               | 1.560387  | -0.647504 |
| 66            | 6             | 0           | -3.363513               | 3.851203  | 0.635285  |

|    |    |   |           |           |           |
|----|----|---|-----------|-----------|-----------|
| 67 | 1  | 0 | -1.625498 | 2.635057  | 1.126883  |
| 68 | 6  | 0 | -5.117029 | 2.748574  | -0.642279 |
| 69 | 1  | 0 | -4.756739 | 0.670607  | -1.156214 |
| 70 | 6  | 0 | -4.617305 | 3.894687  | -0.000378 |
| 71 | 1  | 0 | -2.967609 | 4.745184  | 1.133873  |
| 72 | 1  | 0 | -6.093165 | 2.777675  | -1.143692 |
| 73 | 1  | 0 | -5.203203 | 4.822983  | 0.000810  |
| 74 | 17 | 0 | 0.470401  | 1.271168  | 1.920423  |
| 75 | 6  | 0 | 2.312457  | -0.677578 | -0.341964 |
| 76 | 44 | 0 | 0.182678  | 0.154077  | -0.258788 |

### 7.1.3. (S) conformer c

Standard orientation:

| Center<br>Number | Atomic<br>Number | Atomic<br>Type | Coordinates (Angstroms) |           |           |
|------------------|------------------|----------------|-------------------------|-----------|-----------|
|                  |                  |                | X                       | Y         | Z         |
| 1                | 6                | 0              | 1.383754                | -1.404628 | -2.044169 |
| 2                | 1                | 0              | 1.471523                | -0.695657 | -2.868617 |
| 3                | 6                | 0              | 0.915567                | -2.768083 | -2.153275 |
| 4                | 6                | 0              | 0.984493                | -3.362820 | -0.863923 |
| 5                | 6                | 0              | 1.444494                | -2.354563 | 0.063642  |
| 6                | 1                | 0              | 0.533076                | -3.239673 | -3.061128 |
| 7                | 1                | 0              | 0.693961                | -4.385546 | -0.610721 |
| 8                | 1                | 0              | 1.641632                | -2.496250 | 1.127122  |
| 9                | 6                | 0              | 2.469165                | 0.053941  | -0.154035 |
| 10               | 6                | 0              | 4.023288                | -0.148628 | -0.206805 |
| 11               | 6                | 0              | 2.076218                | 1.329765  | -0.920377 |
| 12               | 6                | 0              | 4.724377                | 1.130406  | 0.302133  |
| 13               | 6                | 0              | 2.793858                | 2.593021  | -0.426997 |
| 14               | 6                | 0              | 4.314271                | 2.381266  | -0.488113 |
| 15               | 1                | 0              | 2.190808                | 0.185968  | 0.906268  |
| 16               | 1                | 0              | 4.284499                | -0.269699 | -1.279890 |
| 17               | 1                | 0              | 4.462825                | 1.280296  | 1.368872  |
| 18               | 1                | 0              | 5.820588                | 0.995196  | 0.255081  |
| 19               | 1                | 0              | 4.840615                | 3.274677  | -0.096260 |
| 20               | 1                | 0              | 4.619325                | 2.266671  | -1.550065 |
| 21               | 1                | 0              | 2.525028                | 2.732767  | 0.638847  |
| 22               | 1                | 0              | 0.987866                | 1.473600  | -0.854756 |
| 23               | 1                | 0              | 2.312435                | 1.193761  | -1.995809 |
| 24               | 6                | 0              | 4.518507                | -1.429329 | 0.520113  |
| 25               | 1                | 0              | 3.963065                | -2.278989 | 0.080208  |
| 26               | 6                | 0              | 4.231608                | -1.416122 | 2.032351  |
| 27               | 1                | 0              | 3.167681                | -1.210198 | 2.249155  |
| 28               | 1                | 0              | 4.494055                | -2.392022 | 2.484457  |
| 29               | 1                | 0              | 4.831739                | -0.638586 | 2.543262  |
| 30               | 6                | 0              | 6.010291                | -1.700379 | 0.252971  |
| 31               | 1                | 0              | 6.655205                | -0.940842 | 0.735878  |
| 32               | 1                | 0              | 6.302507                | -2.688902 | 0.656799  |
| 33               | 1                | 0              | 6.228292                | -1.693402 | -0.832914 |
| 34               | 6                | 0              | 2.335184                | 3.827662  | -1.213308 |
| 35               | 1                | 0              | 1.238750                | 3.963727  | -1.140612 |
| 36               | 1                | 0              | 2.829526                | 4.746574  | -0.841460 |
| 37               | 1                | 0              | 2.586756                | 3.717841  | -2.287597 |
| 38               | 6                | 0              | -1.700864               | -2.699673 | 0.288492  |
| 39               | 8                | 0              | -2.324216               | -3.413750 | 0.966112  |
| 40               | 15               | 0              | -1.405386               | 0.233891  | 0.203830  |
| 41               | 6                | 0              | -1.627487               | 1.723251  | -0.865312 |
| 42               | 6                | 0              | -1.157067               | 1.712453  | -2.192968 |
| 43               | 6                | 0              | -2.278891               | 2.870878  | -0.362644 |
| 44               | 6                | 0              | -1.301863               | 2.854851  | -2.997114 |
| 45               | 1                | 0              | -0.706953               | 0.798421  | -2.593032 |
| 46               | 6                | 0              | -2.416480               | 4.012647  | -1.168015 |
| 47               | 1                | 0              | -2.683768               | 2.867416  | 0.657015  |
| 48               | 6                | 0              | -1.921754               | 4.007467  | -2.485298 |
| 49               | 1                | 0              | -0.936534               | 2.839513  | -4.031808 |
| 50               | 1                | 0              | -2.918418               | 4.904010  | -0.770087 |
| 51               | 1                | 0              | -2.033705               | 4.898507  | -3.116580 |
| 52               | 6                | 0              | -0.323325               | 0.779351  | 1.600996  |
| 53               | 6                | 0              | 0.068844                | -0.218228 | 2.521938  |

|    |    |   |           |           |           |
|----|----|---|-----------|-----------|-----------|
| 54 | 6  | 0 | 0.150745  | 2.092980  | 1.768946  |
| 55 | 6  | 0 | 0.916981  | 0.096120  | 3.593037  |
| 56 | 1  | 0 | -0.284214 | -1.246602 | 2.382501  |
| 57 | 6  | 0 | 1.010724  | 2.404522  | 2.838162  |
| 58 | 1  | 0 | -0.130496 | 2.873065  | 1.054120  |
| 59 | 6  | 0 | 1.396511  | 1.410296  | 3.750803  |
| 60 | 1  | 0 | 1.213211  | -0.687437 | 4.301856  |
| 61 | 1  | 0 | 1.384200  | 3.430260  | 2.950295  |
| 62 | 1  | 0 | 2.070965  | 1.655047  | 4.581141  |
| 63 | 6  | 0 | -3.067479 | 0.085234  | 0.999485  |
| 64 | 6  | 0 | -3.321544 | 0.530875  | 2.313161  |
| 65 | 6  | 0 | -4.113274 | -0.478440 | 0.234915  |
| 66 | 6  | 0 | -4.612248 | 0.414121  | 2.858688  |
| 67 | 1  | 0 | -2.514704 | 0.965482  | 2.914848  |
| 68 | 6  | 0 | -5.398757 | -0.588103 | 0.786594  |
| 69 | 1  | 0 | -3.912730 | -0.833174 | -0.784707 |
| 70 | 6  | 0 | -5.652242 | -0.144069 | 2.097181  |
| 71 | 1  | 0 | -4.801781 | 0.759507  | 3.883364  |
| 72 | 1  | 0 | -6.206449 | -1.029425 | 0.188667  |
| 73 | 1  | 0 | -6.658712 | -0.236713 | 2.525498  |
| 74 | 6  | 0 | 1.747616  | -1.158742 | -0.682923 |
| 75 | 44 | 0 | -0.561127 | -1.688413 | -0.765002 |
| 76 | 17 | 0 | -2.172759 | -1.494305 | -2.616793 |

#### 7.1.4. (S) conformer d

Standard orientation:

| Center<br>Number | Atomic<br>Number | Atomic<br>Type | Coordinates (Angstroms) |           |           |
|------------------|------------------|----------------|-------------------------|-----------|-----------|
|                  |                  |                | X                       | Y         | Z         |
| 1                | 6                | 0              | -1.630325               | 0.233695  | -2.694065 |
| 2                | 1                | 0              | -2.075398               | -0.626739 | -3.196714 |
| 3                | 6                | 0              | -0.749012               | 1.172071  | -3.298884 |
| 4                | 6                | 0              | -0.295021               | 2.073056  | -2.262490 |
| 5                | 6                | 0              | -0.936404               | 1.685435  | -1.040293 |
| 6                | 1                | 0              | -0.443042               | 1.185598  | -4.347496 |
| 7                | 1                | 0              | 0.377639                | 2.924522  | -2.388702 |
| 8                | 1                | 0              | -0.812088               | 2.182851  | -0.078295 |
| 9                | 6                | 0              | -2.705582               | -0.135980 | -0.314020 |
| 10               | 6                | 0              | -4.035531               | 0.649552  | -0.065062 |
| 11               | 6                | 0              | -3.030487               | -1.576115 | -0.763394 |
| 12               | 6                | 0              | -4.887639               | -0.120909 | 0.969364  |
| 13               | 6                | 0              | -3.859052               | -2.339296 | 0.280126  |
| 14               | 6                | 0              | -5.164790               | -1.573597 | 0.551848  |
| 15               | 1                | 0              | -2.184130               | -0.195072 | 0.660530  |
| 16               | 1                | 0              | -4.588084               | 0.644845  | -1.029206 |
| 17               | 1                | 0              | -4.347733               | -0.125597 | 1.937737  |
| 18               | 1                | 0              | -5.842059               | 0.411573  | 1.138369  |
| 19               | 1                | 0              | -5.756819               | -2.089945 | 1.334026  |
| 20               | 1                | 0              | -5.778358               | -1.581663 | -0.374186 |
| 21               | 1                | 0              | -3.276443               | -2.348841 | 1.224766  |
| 22               | 1                | 0              | -2.098698               | -2.117301 | -1.008226 |
| 23               | 1                | 0              | -3.616456               | -1.530358 | -1.705313 |
| 24               | 6                | 0              | -3.829137               | 2.138748  | 0.321735  |
| 25               | 1                | 0              | -3.216322               | 2.589989  | -0.481790 |
| 26               | 6                | 0              | -3.071090               | 2.323162  | 1.648781  |
| 27               | 1                | 0              | -2.120414               | 1.760526  | 1.664303  |
| 28               | 1                | 0              | -2.832027               | 3.391252  | 1.814928  |
| 29               | 1                | 0              | -3.680398               | 1.977365  | 2.505971  |
| 30               | 6                | 0              | -5.157313               | 2.916695  | 0.343265  |
| 31               | 1                | 0              | -5.809716               | 2.584477  | 1.173927  |
| 32               | 1                | 0              | -4.971675               | 3.999802  | 0.479335  |
| 33               | 1                | 0              | -5.714140               | 2.778565  | -0.604205 |
| 34               | 6                | 0              | -4.109975               | -3.788647 | -0.153795 |
| 35               | 1                | 0              | -3.155180               | -4.325326 | -0.316936 |
| 36               | 1                | 0              | -4.697531               | -4.340249 | 0.606317  |
| 37               | 1                | 0              | -4.677286               | -3.814762 | -1.106052 |
| 38               | 6                | 0              | 2.131216                | 0.250162  | -2.521801 |
| 39               | 8                | 0              | 3.115363                | 0.496009  | -3.094473 |
| 40               | 15               | 0              | 1.525856                | -0.044156 | 0.368105  |
| 41               | 6                | 0              | 0.809153                | -1.073894 | 1.724130  |

|    |    |   |           |           |           |
|----|----|---|-----------|-----------|-----------|
| 42 | 6  | 0 | -0.246338 | -1.963000 | 1.451358  |
| 43 | 6  | 0 | 1.349646  | -1.006069 | 3.028312  |
| 44 | 6  | 0 | -0.770054 | -2.766452 | 2.480118  |
| 45 | 1  | 0 | -0.621005 | -2.051218 | 0.428888  |
| 46 | 6  | 0 | 0.817289  | -1.802109 | 4.053271  |
| 47 | 1  | 0 | 2.188273  | -0.331761 | 3.240507  |
| 48 | 6  | 0 | -0.246647 | -2.683042 | 3.780333  |
| 49 | 1  | 0 | -1.585094 | -3.465682 | 2.255891  |
| 50 | 1  | 0 | 1.238230  | -1.741877 | 5.065228  |
| 51 | 1  | 0 | -0.657812 | -3.311036 | 4.581312  |
| 52 | 6  | 0 | 1.545686  | 1.671187  | 1.054201  |
| 53 | 6  | 0 | 2.284522  | 2.649812  | 0.351606  |
| 54 | 6  | 0 | 0.729375  | 2.067612  | 2.131923  |
| 55 | 6  | 0 | 2.215697  | 3.997926  | 0.731529  |
| 56 | 1  | 0 | 2.907313  | 2.353097  | -0.501365 |
| 57 | 6  | 0 | 0.651067  | 3.422904  | 2.501942  |
| 58 | 1  | 0 | 0.140939  | 1.321469  | 2.677236  |
| 59 | 6  | 0 | 1.393349  | 4.389899  | 1.805710  |
| 60 | 1  | 0 | 2.799360  | 4.748149  | 0.182643  |
| 61 | 1  | 0 | 0.002178  | 3.719309  | 3.335910  |
| 62 | 1  | 0 | 1.331493  | 5.446734  | 2.094950  |
| 63 | 6  | 0 | 3.298048  | -0.558281 | 0.384716  |
| 64 | 6  | 0 | 4.265118  | 0.100230  | 1.173329  |
| 65 | 6  | 0 | 3.666534  | -1.681506 | -0.386862 |
| 66 | 6  | 0 | 5.592698  | -0.359862 | 1.187373  |
| 67 | 1  | 0 | 3.986339  | 0.977817  | 1.768704  |
| 68 | 6  | 0 | 4.994192  | -2.137273 | -0.363099 |
| 69 | 1  | 0 | 2.912072  | -2.192527 | -0.999164 |
| 70 | 6  | 0 | 5.959042  | -1.478915 | 0.420074  |
| 71 | 1  | 0 | 6.341939  | 0.160487  | 1.798139  |
| 72 | 1  | 0 | 5.276303  | -3.009673 | -0.966238 |
| 73 | 1  | 0 | 6.997141  | -1.835611 | 0.430040  |
| 74 | 6  | 0 | -1.776473 | 0.541139  | -1.290774 |
| 75 | 44 | 0 | 0.479057  | 0.046494  | -1.687558 |
| 76 | 17 | 0 | 0.468168  | -2.406159 | -1.948943 |

## 7.2. (R)<sub>Ru</sub>

Coordinates of optimized structures of (R)<sub>Ru</sub> commented in the text (B97D/SVP level).

### 7.2.1. (R) conformer a

Standard orientation:

| Center<br>Number | Atomic<br>Number | Atomic<br>Type | Coordinates (Angstroms) |           |           |
|------------------|------------------|----------------|-------------------------|-----------|-----------|
|                  |                  |                | X                       | Y         | Z         |
| 1                | 6                | 0              | 1.745864                | -0.417663 | -1.688764 |
| 2                | 1                | 0              | 2.050681                | 0.350176  | -2.402905 |
| 3                | 6                | 0              | 0.616535                | -1.285884 | -1.841870 |
| 4                | 6                | 0              | 0.489361                | -2.044952 | -0.625704 |
| 5                | 6                | 0              | 1.544979                | -1.639192 | 0.257929  |
| 6                | 1                | 0              | -0.049566               | -1.336203 | -2.705124 |
| 7                | 1                | 0              | -0.264574               | -2.808377 | -0.419496 |
| 8                | 1                | 0              | 1.747724                | -2.044855 | 1.251895  |
| 9                | 6                | 0              | 3.548493                | 0.075292  | 0.161080  |
| 10               | 6                | 0              | 4.886129                | -0.584179 | -0.293866 |
| 11               | 6                | 0              | 3.541155                | 1.577505  | -0.191321 |
| 12               | 6                | 0              | 6.068309                | 0.174323  | 0.346846  |
| 13               | 6                | 0              | 4.721599                | 2.334606  | 0.435504  |
| 14               | 6                | 0              | 6.046623                | 1.674471  | 0.012021  |
| 15               | 1                | 0              | 3.494177                | -0.009088 | 1.264494  |
| 16               | 1                | 0              | 4.947569                | -0.433840 | -1.393421 |
| 17               | 1                | 0              | 6.016128                | 0.052236  | 1.447435  |
| 18               | 1                | 0              | 7.024959                | -0.274453 | 0.019503  |
| 19               | 1                | 0              | 6.900844                | 2.188734  | 0.496286  |
| 20               | 1                | 0              | 6.170581                | 1.807307  | -1.083948 |
| 21               | 1                | 0              | 4.634340                | 2.236532  | 1.539495  |
| 22               | 1                | 0              | 2.574843                | 2.020699  | 0.109113  |
| 23               | 1                | 0              | 3.598914                | 1.687589  | -1.293948 |
| 24               | 6                | 0              | 4.930966                | -2.117577 | -0.051753 |



|    |    |   |           |           |           |
|----|----|---|-----------|-----------|-----------|
| 25 | 1  | 0 | 4.026060  | -2.537467 | -0.534868 |
| 26 | 6  | 0 | 4.879563  | -2.499382 | 1.438294  |
| 27 | 1  | 0 | 4.008246  | -2.049154 | 1.949521  |
| 28 | 1  | 0 | 4.812732  | -3.598300 | 1.555090  |
| 29 | 1  | 0 | 5.791112  | -2.160922 | 1.967468  |
| 30 | 6  | 0 | 6.145705  | -2.767997 | -0.737001 |
| 31 | 1  | 0 | 7.095305  | -2.442751 | -0.269285 |
| 32 | 1  | 0 | 6.095637  | -3.871274 | -0.656792 |
| 33 | 1  | 0 | 6.186475  | -2.501242 | -1.811186 |
| 34 | 6  | 0 | 4.680478  | 3.824701  | 0.072275  |
| 35 | 1  | 0 | 3.726420  | 4.285819  | 0.392111  |
| 36 | 1  | 0 | 5.514861  | 4.377348  | 0.547092  |
| 37 | 1  | 0 | 4.766339  | 3.954136  | -1.025432 |
| 38 | 6  | 0 | 0.389342  | 0.807524  | 1.658699  |
| 39 | 8  | 0 | 0.619188  | 1.164280  | 2.746400  |
| 40 | 15 | 0 | -2.105081 | -0.037170 | 0.081911  |
| 41 | 6  | 0 | -2.720293 | -1.184058 | 1.393863  |
| 42 | 6  | 0 | -4.098415 | -1.310335 | 1.673873  |
| 43 | 6  | 0 | -1.790832 | -1.954012 | 2.120275  |
| 44 | 6  | 0 | -4.537500 | -2.209203 | 2.658713  |
| 45 | 1  | 0 | -4.826248 | -0.699365 | 1.126429  |
| 46 | 6  | 0 | -2.232452 | -2.851425 | 3.107547  |
| 47 | 1  | 0 | -0.723227 | -1.825455 | 1.908665  |
| 48 | 6  | 0 | -3.605531 | -2.983018 | 3.375222  |
| 49 | 1  | 0 | -5.610110 | -2.302106 | 2.872456  |
| 50 | 1  | 0 | -1.501382 | -3.443526 | 3.673046  |
| 51 | 1  | 0 | -3.951017 | -3.681861 | 4.147941  |
| 52 | 6  | 0 | -2.730210 | -0.744208 | -1.499982 |
| 53 | 6  | 0 | -2.536432 | 0.026923  | -2.669577 |
| 54 | 6  | 0 | -3.296112 | -2.030439 | -1.593268 |
| 55 | 6  | 0 | -2.922001 | -0.487851 | -3.915691 |
| 56 | 1  | 0 | -2.059734 | 1.013758  | -2.593270 |
| 57 | 6  | 0 | -3.670820 | -2.544030 | -2.849005 |
| 58 | 1  | 0 | -3.446032 | -2.631464 | -0.688339 |
| 59 | 6  | 0 | -3.488506 | -1.774449 | -4.009452 |
| 60 | 1  | 0 | -2.772777 | 0.114991  | -4.820826 |
| 61 | 1  | 0 | -4.108920 | -3.548286 | -2.916384 |
| 62 | 1  | 0 | -3.783952 | -2.175734 | -4.987474 |
| 63 | 6  | 0 | -3.126731 | 1.477919  | 0.320520  |
| 64 | 6  | 0 | -2.648656 | 2.502807  | 1.162687  |
| 65 | 6  | 0 | -4.391895 | 1.610838  | -0.289834 |
| 66 | 6  | 0 | -3.440671 | 3.634481  | 1.409722  |
| 67 | 1  | 0 | -1.655012 | 2.425808  | 1.613986  |
| 68 | 6  | 0 | -5.178785 | 2.748903  | -0.044061 |
| 69 | 1  | 0 | -4.757528 | 0.831091  | -0.968795 |
| 70 | 6  | 0 | -4.705907 | 3.760323  | 0.808884  |
| 71 | 1  | 0 | -3.059842 | 4.429063  | 2.063749  |
| 72 | 1  | 0 | -6.160592 | 2.845764  | -0.525332 |
| 73 | 1  | 0 | -5.318560 | 4.651316  | 0.997847  |
| 74 | 17 | 0 | -0.087194 | 2.328674  | -1.108500 |
| 75 | 6  | 0 | 2.338274  | -0.622082 | -0.400849 |
| 76 | 44 | 0 | 0.187736  | 0.129253  | -0.056225 |

## 7.2.2. (R) conformer b

Standard orientation:

| Center Number | Atomic Number | Atomic Type | Coordinates (Angstroms) |           |           |
|---------------|---------------|-------------|-------------------------|-----------|-----------|
|               |               |             | X                       | Y         | Z         |
| 1             | 6             | 0           | -1.176370               | -0.686758 | 1.442029  |
| 2             | 1             | 0           | -1.060301               | 0.242978  | 1.999110  |
| 3             | 6             | 0           | -0.347841               | -1.859857 | 1.581607  |
| 4             | 6             | 0           | -0.820383               | -2.838483 | 0.642459  |
| 5             | 6             | 0           | -1.916677               | -2.262270 | -0.090268 |
| 6             | 1             | 0           | 0.450605                | -2.000132 | 2.313787  |
| 7             | 1             | 0           | -0.428538               | -3.851509 | 0.517902  |
| 8             | 1             | 0           | -2.488431               | -2.745384 | -0.882549 |
| 9             | 6             | 0           | -3.168554               | 0.049548  | -0.087481 |
| 10            | 6             | 0           | -4.621463               | -0.265666 | 0.403616  |
| 11            | 6             | 0           | -2.788706               | 1.496135  | 0.285157  |
| 12            | 6             | 0           | -5.587378               | 0.782395  | -0.195102 |

|    |    |   |           |           |           |
|----|----|---|-----------|-----------|-----------|
| 13 | 6  | 0 | -3.750502 | 2.531402  | -0.313614 |
| 14 | 6  | 0 | -5.186853 | 2.225109  | 0.144502  |
| 15 | 1  | 0 | -3.154109 | -0.019005 | -1.192224 |
| 16 | 1  | 0 | -4.617309 | -0.127514 | 1.506388  |
| 17 | 1  | 0 | -5.597263 | 0.665243  | -1.296952 |
| 18 | 1  | 0 | -6.616492 | 0.584714  | 0.158271  |
| 19 | 1  | 0 | -5.898149 | 2.938794  | -0.317857 |
| 20 | 1  | 0 | -5.247767 | 2.376028  | 1.243720  |
| 21 | 1  | 0 | -3.710885 | 2.416195  | -1.417176 |
| 22 | 1  | 0 | -1.761882 | 1.689792  | -0.063088 |
| 23 | 1  | 0 | -2.796764 | 1.603433  | 1.390179  |
| 24 | 6  | 0 | -5.089345 | -1.722746 | 0.138792  |
| 25 | 1  | 0 | -4.334770 | -2.386783 | 0.601322  |
| 26 | 6  | 0 | -5.167999 | -2.069691 | -1.358736 |
| 27 | 1  | 0 | -4.232516 | -1.817646 | -1.891595 |
| 28 | 1  | 0 | -5.364075 | -3.150501 | -1.497998 |
| 29 | 1  | 0 | -5.990352 | -1.515445 | -1.850509 |
| 30 | 6  | 0 | -6.425441 | -2.032416 | 0.838355  |
| 31 | 1  | 0 | -7.262753 | -1.468404 | 0.384050  |
| 32 | 1  | 0 | -6.667038 | -3.109723 | 0.754884  |
| 33 | 1  | 0 | -6.381287 | -1.771123 | 1.913886  |
| 34 | 6  | 0 | -3.322428 | 3.961488  | 0.039917  |
| 35 | 1  | 0 | -2.304689 | 4.174189  | -0.340604 |
| 36 | 1  | 0 | -4.016718 | 4.707720  | -0.393591 |
| 37 | 1  | 0 | -3.314015 | 4.103181  | 1.139896  |
| 38 | 6  | 0 | 0.933954  | -2.223741 | -1.712563 |
| 39 | 8  | 0 | 1.438263  | -2.988872 | -2.435186 |
| 40 | 15 | 0 | 1.931958  | 0.071208  | 0.053625  |
| 41 | 6  | 0 | 3.263645  | -0.913563 | 0.875902  |
| 42 | 6  | 0 | 4.464860  | -0.305196 | 1.301451  |
| 43 | 6  | 0 | 3.076927  | -2.294582 | 1.079459  |
| 44 | 6  | 0 | 5.457371  | -1.069844 | 1.933708  |
| 45 | 1  | 0 | 4.625776  | 0.766190  | 1.132980  |
| 46 | 6  | 0 | 4.074352  | -3.060117 | 1.707956  |
| 47 | 1  | 0 | 2.146209  | -2.756201 | 0.731489  |
| 48 | 6  | 0 | 5.263431  | -2.448801 | 2.138859  |
| 49 | 1  | 0 | 6.388179  | -0.589972 | 2.262429  |
| 50 | 1  | 0 | 3.922335  | -4.136926 | 1.856612  |
| 51 | 1  | 0 | 6.043172  | -3.045858 | 2.629107  |
| 52 | 6  | 0 | 1.446042  | 1.339324  | 1.293476  |
| 53 | 6  | 0 | 0.656441  | 2.419094  | 0.838604  |
| 54 | 6  | 0 | 1.714030  | 1.196530  | 2.669248  |
| 55 | 6  | 0 | 0.146514  | 3.347855  | 1.756768  |
| 56 | 1  | 0 | 0.421941  | 2.502292  | -0.230530 |
| 57 | 6  | 0 | 1.193516  | 2.128060  | 3.585686  |
| 58 | 1  | 0 | 2.325061  | 0.357984  | 3.024357  |
| 59 | 6  | 0 | 0.410987  | 3.203680  | 3.132081  |
| 60 | 1  | 0 | -0.475992 | 4.176806  | 1.398684  |
| 61 | 1  | 0 | 1.402457  | 2.011655  | 4.657011  |
| 62 | 1  | 0 | 0.004825  | 3.928753  | 3.848947  |
| 63 | 6  | 0 | 2.841873  | 1.033188  | -1.228870 |
| 64 | 6  | 0 | 2.904241  | 0.536659  | -2.546612 |
| 65 | 6  | 0 | 3.513642  | 2.231164  | -0.903602 |
| 66 | 6  | 0 | 3.651506  | 1.218927  | -3.519453 |
| 67 | 1  | 0 | 2.357688  | -0.370731 | -2.818210 |
| 68 | 6  | 0 | 4.255078  | 2.913940  | -1.882148 |
| 69 | 1  | 0 | 3.445859  | 2.640343  | 0.111645  |
| 70 | 6  | 0 | 4.328463  | 2.406340  | -3.190675 |
| 71 | 1  | 0 | 3.691544  | 0.826636  | -4.543450 |
| 72 | 1  | 0 | 4.771794  | 3.846557  | -1.621077 |
| 73 | 1  | 0 | 4.905100  | 2.941160  | -3.956417 |
| 74 | 17 | 0 | -0.495311 | 0.566292  | -2.207103 |
| 75 | 6  | 0 | -2.140700 | -0.930237 | 0.415490  |
| 76 | 44 | 0 | 0.050840  | -1.128252 | -0.508204 |

### 7.2.3. (R) conformer c

Standard orientation:

| Center<br>Number | Atomic<br>Number | Atomic<br>Type | Coordinates (Angstroms) |   |   |
|------------------|------------------|----------------|-------------------------|---|---|
|                  |                  |                | X                       | Y | Z |

|    |    |   |           |           |           |
|----|----|---|-----------|-----------|-----------|
| 1  | 6  | 0 | -1.873341 | 0.881476  | -2.179729 |
| 2  | 1  | 0 | -2.429476 | 0.327141  | -2.938700 |
| 3  | 6  | 0 | -0.923472 | 1.912027  | -2.425045 |
| 4  | 6  | 0 | -0.412340 | 2.377751  | -1.160349 |
| 5  | 6  | 0 | -1.055571 | 1.611816  | -0.136808 |
| 6  | 1  | 0 | -0.581134 | 2.247932  | -3.406610 |
| 7  | 1  | 0 | 0.340862  | 3.152802  | -1.012285 |
| 8  | 1  | 0 | -0.899382 | 1.718557  | 0.938671  |
| 9  | 6  | 0 | -2.992612 | -0.148839 | -0.026554 |
| 10 | 6  | 0 | -4.384025 | 0.564717  | -0.065746 |
| 11 | 6  | 0 | -3.111643 | -1.584375 | -0.575579 |
| 12 | 6  | 0 | -5.418690 | -0.285465 | 0.701344  |
| 13 | 6  | 0 | -4.156455 | -2.426845 | 0.174267  |
| 14 | 6  | 0 | -5.519821 | -1.715060 | 0.150291  |
| 15 | 1  | 0 | -2.691593 | -0.214688 | 1.036779  |
| 16 | 1  | 0 | -4.691705 | 0.582093  | -1.133160 |
| 17 | 1  | 0 | -5.124616 | -0.330597 | 1.769329  |
| 18 | 1  | 0 | -6.408292 | 0.206139  | 0.662444  |
| 19 | 1  | 0 | -6.264327 | -2.299594 | 0.726801  |
| 20 | 1  | 0 | -5.881002 | -1.680858 | -0.899543 |
| 21 | 1  | 0 | -3.831179 | -2.488352 | 1.236225  |
| 22 | 1  | 0 | -2.130703 | -2.086073 | -0.527059 |
| 23 | 1  | 0 | -3.387625 | -1.541267 | -1.649082 |
| 24 | 6  | 0 | -4.337103 | 2.044123  | 0.406193  |
| 25 | 1  | 0 | -3.569777 | 2.549098  | -0.211900 |
| 26 | 6  | 0 | -3.920298 | 2.198359  | 1.879508  |
| 27 | 1  | 0 | -2.950120 | 1.710391  | 2.087967  |
| 28 | 1  | 0 | -3.822259 | 3.268932  | 2.143113  |
| 29 | 1  | 0 | -4.675965 | 1.754407  | 2.556172  |
| 30 | 6  | 0 | -5.668077 | 2.769635  | 0.139635  |
| 31 | 1  | 0 | -6.480480 | 2.378719  | 0.782650  |
| 32 | 1  | 0 | -5.569061 | 3.851923  | 0.350270  |
| 33 | 1  | 0 | -5.981318 | 2.651184  | -0.916052 |
| 34 | 6  | 0 | -4.234715 | -3.849433 | -0.394530 |
| 35 | 1  | 0 | -3.248668 | -4.351299 | -0.353981 |
| 36 | 1  | 0 | -4.964563 | -4.465613 | 0.165953  |
| 37 | 1  | 0 | -4.555988 | -3.821774 | -1.455063 |
| 38 | 6  | 0 | 0.075895  | -1.641160 | -1.768893 |
| 39 | 8  | 0 | -0.061773 | -2.770635 | -2.030588 |
| 40 | 15 | 0 | 1.748993  | -0.103198 | 0.271372  |
| 41 | 6  | 0 | 1.152601  | -1.054853 | 1.738926  |
| 42 | 6  | 0 | 2.003705  | -1.371286 | 2.819974  |
| 43 | 6  | 0 | -0.193636 | -1.462506 | 1.775741  |
| 44 | 6  | 0 | 1.500974  | -2.071659 | 3.928124  |
| 45 | 1  | 0 | 3.059563  | -1.076767 | 2.792362  |
| 46 | 6  | 0 | -0.695893 | -2.165580 | 2.883407  |
| 47 | 1  | 0 | -0.829295 | -1.229242 | 0.917990  |
| 48 | 6  | 0 | 0.150366  | -2.467468 | 3.963609  |
| 49 | 1  | 0 | 2.167164  | -2.315175 | 4.765804  |
| 50 | 1  | 0 | -1.747279 | -2.481072 | 2.895557  |
| 51 | 1  | 0 | -0.237059 | -3.018398 | 4.830348  |
| 52 | 6  | 0 | 2.186516  | 1.560587  | 0.932266  |
| 53 | 6  | 0 | 2.848507  | 2.446922  | 0.052180  |
| 54 | 6  | 0 | 1.817157  | 1.994015  | 2.220415  |
| 55 | 6  | 0 | 3.148297  | 3.751147  | 0.472217  |
| 56 | 1  | 0 | 3.097817  | 2.111341  | -0.963879 |
| 57 | 6  | 0 | 2.112546  | 3.307431  | 2.630566  |
| 58 | 1  | 0 | 1.301422  | 1.308323  | 2.903354  |
| 59 | 6  | 0 | 2.780464  | 4.185047  | 1.760852  |
| 60 | 1  | 0 | 3.665466  | 4.435870  | -0.212322 |
| 61 | 1  | 0 | 1.821127  | 3.641902  | 3.634665  |
| 62 | 1  | 0 | 3.012770  | 5.207950  | 2.084224  |
| 63 | 6  | 0 | 3.387012  | -0.866618 | -0.092980 |
| 64 | 6  | 0 | 3.472018  | -1.906561 | -1.041231 |
| 65 | 6  | 0 | 4.547123  | -0.460040 | 0.600410  |
| 66 | 6  | 0 | 4.699384  | -2.546577 | -1.272862 |
| 67 | 1  | 0 | 2.587509  | -2.208212 | -1.608973 |
| 68 | 6  | 0 | 5.774599  | -1.100893 | 0.361443  |
| 69 | 1  | 0 | 4.495927  | 0.367392  | 1.318477  |
| 70 | 6  | 0 | 5.851724  | -2.147357 | -0.573142 |
| 71 | 1  | 0 | 4.756716  | -3.352220 | -2.015652 |
| 72 | 1  | 0 | 6.672403  | -0.776038 | 0.903093  |
| 73 | 1  | 0 | 6.811341  | -2.645186 | -0.763492 |
| 74 | 17 | 0 | 2.052680  | 0.520067  | -2.970864 |

|    |    |   |           |          |           |
|----|----|---|-----------|----------|-----------|
| 75 | 6  | 0 | -1.955101 | 0.669977 | -0.747753 |
| 76 | 44 | 0 | 0.195226  | 0.176534 | -1.398561 |

#### 7.2.4. (R) conformer d

Standard orientation:

| Center<br>Number | Atomic<br>Number | Atomic<br>Type | Coordinates (Angstroms) |           |           |
|------------------|------------------|----------------|-------------------------|-----------|-----------|
|                  |                  |                | X                       | Y         | Z         |
| 1                | 6                | 0              | 1.629978                | -0.586627 | 2.164915  |
| 2                | 1                | 0              | 1.998372                | -1.587901 | 2.394861  |
| 3                | 6                | 0              | 0.363560                | -0.051943 | 2.593473  |
| 4                | 6                | 0              | 0.240082                | 1.256264  | 2.023932  |
| 5                | 6                | 0              | 1.414401                | 1.510211  | 1.238980  |
| 6                | 1                | 0              | -0.374059               | -0.559005 | 3.217784  |
| 7                | 1                | 0              | -0.601673               | 1.939544  | 2.158542  |
| 8                | 1                | 0              | 1.636912                | 2.438939  | 0.711721  |
| 9                | 6                | 0              | 3.725599                | 0.292065  | 0.813790  |
| 10               | 6                | 0              | 3.964298                | -0.729112 | -0.344602 |
| 11               | 6                | 0              | 4.217200                | 1.694444  | 0.386804  |
| 12               | 6                | 0              | 5.452934                | -0.699409 | -0.753351 |
| 13               | 6                | 0              | 5.693960                | 1.721031  | -0.039023 |
| 14               | 6                | 0              | 5.923448                | 0.701118  | -1.166956 |
| 15               | 1                | 0              | 4.360664                | -0.039186 | 1.661617  |
| 16               | 1                | 0              | 3.375958                | -0.357538 | -1.206169 |
| 17               | 1                | 0              | 6.068201                | -1.047965 | 0.100634  |
| 18               | 1                | 0              | 5.618791                | -1.415363 | -1.579228 |
| 19               | 1                | 0              | 6.994763                | 0.684659  | -1.450910 |
| 20               | 1                | 0              | 5.356269                | 1.031643  | -2.062723 |
| 21               | 1                | 0              | 6.300756                | 1.398296  | 0.834480  |
| 22               | 1                | 0              | 4.052641                | 2.414866  | 1.212226  |
| 23               | 1                | 0              | 3.599483                | 2.037448  | -0.469533 |
| 24               | 6                | 0              | 3.460046                | -2.162254 | -0.045060 |
| 25               | 1                | 0              | 2.406554                | -2.071354 | 0.255886  |
| 26               | 6                | 0              | 4.223560                | -2.857900 | 1.093688  |
| 27               | 1                | 0              | 4.258778                | -2.235693 | 2.009565  |
| 28               | 1                | 0              | 3.730090                | -3.813966 | 1.353946  |
| 29               | 1                | 0              | 5.268351                | -3.086192 | 0.804682  |
| 30               | 6                | 0              | 3.436843                | -3.033571 | -1.311438 |
| 31               | 1                | 0              | 4.456576                | -3.252095 | -1.687074 |
| 32               | 1                | 0              | 2.935574                | -3.996189 | -1.098351 |
| 33               | 1                | 0              | 2.867688                | -2.530388 | -2.116236 |
| 34               | 6                | 0              | 6.131029                | 3.135104  | -0.444331 |
| 35               | 1                | 0              | 5.979743                | 3.856555  | 0.382600  |
| 36               | 1                | 0              | 7.200283                | 3.155974  | -0.731576 |
| 37               | 1                | 0              | 5.539344                | 3.485334  | -1.314168 |
| 38               | 6                | 0              | 0.787552                | 0.065678  | -1.467554 |
| 39               | 8                | 0              | 1.168324                | 0.309241  | -2.545140 |
| 40               | 15               | 0              | -1.946918               | 0.143634  | -0.141243 |
| 41               | 6                | 0              | -2.357414               | 1.828099  | -0.781977 |
| 42               | 6                | 0              | -3.665636               | 2.156418  | -1.199829 |
| 43               | 6                | 0              | -1.345990               | 2.806926  | -0.837498 |
| 44               | 6                | 0              | -3.956222               | 3.452699  | -1.652977 |
| 45               | 1                | 0              | -4.455028               | 1.395923  | -1.177854 |
| 46               | 6                | 0              | -1.638785               | 4.103757  | -1.293014 |
| 47               | 1                | 0              | -0.330293               | 2.531680  | -0.533244 |
| 48               | 6                | 0              | -2.944021               | 4.429430  | -1.698012 |
| 49               | 1                | 0              | -4.975037               | 3.700219  | -1.977784 |
| 50               | 1                | 0              | -0.843137               | 4.858586  | -1.337537 |
| 51               | 1                | 0              | -3.172864               | 5.441205  | -2.056852 |
| 52               | 6                | 0              | -2.885871               | 0.003593  | 1.438114  |
| 53               | 6                | 0              | -2.913704               | -1.264062 | 2.063400  |
| 54               | 6                | 0              | -3.488552               | 1.109804  | 2.069111  |
| 55               | 6                | 0              | -3.554066               | -1.417583 | 3.301694  |
| 56               | 1                | 0              | -2.411851               | -2.114041 | 1.582515  |
| 57               | 6                | 0              | -4.120440               | 0.949556  | 3.316185  |
| 58               | 1                | 0              | -3.467738               | 2.095468  | 1.588868  |
| 59               | 6                | 0              | -4.157773               | -0.312139 | 3.931980  |
| 60               | 1                | 0              | -3.576358               | -2.404634 | 3.781399  |
| 61               | 1                | 0              | -4.587006               | 1.815313  | 3.803758  |
| 62               | 1                | 0              | -4.654211               | -0.435451 | 4.903118  |

|    |    |   |           |           |           |
|----|----|---|-----------|-----------|-----------|
| 63 | 6  | 0 | -2.847612 | -0.983714 | -1.287760 |
| 64 | 6  | 0 | -2.172685 | -1.515740 | -2.405478 |
| 65 | 6  | 0 | -4.212878 | -1.282050 | -1.091449 |
| 66 | 6  | 0 | -2.865108 | -2.313505 | -3.329233 |
| 67 | 1  | 0 | -1.104886 | -1.324812 | -2.544753 |
| 68 | 6  | 0 | -4.900329 | -2.086533 | -2.016106 |
| 69 | 1  | 0 | -4.737581 | -0.896707 | -0.208906 |
| 70 | 6  | 0 | -4.228647 | -2.599295 | -3.138655 |
| 71 | 1  | 0 | -2.330924 | -2.726175 | -4.194350 |
| 72 | 1  | 0 | -5.961526 | -2.315916 | -1.854326 |
| 73 | 1  | 0 | -4.764633 | -3.230432 | -3.859286 |
| 74 | 17 | 0 | -0.152285 | -2.620741 | 0.069945  |
| 75 | 6  | 0 | 2.310346  | 0.372282  | 1.352639  |
| 76 | 44 | 0 | 0.283510  | -0.206245 | 0.297431  |

---

## 8. Table of interatomic distances

**Table 3SI.** Atom-atom distances in (*S*)<sub>RU</sub> and (*R*)<sub>RU</sub> as evaluated from NOE spectra; X-Ray diffraction data<sup>51</sup>; DFT calculated data of the lowest energy structures (the data for calculated geometries which are in best agreement with X-ray and NOE data, are given in blue).

| S                                | XRD <sup>[a]</sup> | NOE <sup>[b]</sup> | a <sup>[c]</sup> | b   | c   | d   | R                                | NOE  | a   | b   | c   | d   |
|----------------------------------|--------------------|--------------------|------------------|-----|-----|-----|----------------------------------|------|-----|-----|-----|-----|
| H <sub>1</sub> - H <sub>5</sub>  | 2.69               | 2.8                | 2.7              | 2.6 | 2.8 | 2.8 | H <sub>1</sub> - H <sub>5</sub>  | 2.8  | 2.7 | 2.8 | 2.6 | 2.9 |
| H <sub>1</sub> - H <sub>17</sub> | 2.92               | 2.8                | 2.6              | 3.1 | 2.6 | 2.5 | H <sub>1</sub> - H <sub>17</sub> | 2.7  | 2.9 | 2.4 | 3.0 | 2.2 |
| H <sub>1</sub> - C <sub>15</sub> | 2.77               | 2.9                | 2.3              | 2.6 | 2.4 | 2.3 | H <sub>1</sub> - C <sub>15</sub> | 2.8  | 2.5 | 2.3 | 2.5 | 2.4 |
| H <sub>4</sub> - H <sub>6</sub>  | 2.41               | 2.5                | 2.3              | 2.4 | 2.2 | 2.3 | H <sub>4</sub> - H <sub>6</sub>  | 2.4  | 2.3 | 2.3 | 2.5 | 2.3 |
| H <sub>4</sub> - H <sub>7</sub>  | 3.21               | 3.7                | 2.9              | 3.3 | 3.0 | 2.7 | H <sub>4</sub> - H <sub>7</sub>  | n.d. | 3.1 | 2.6 | 3.4 | 2.5 |
| H <sub>1</sub> - oPh             | 3.18               | 3.1                | 2.2              | 2.4 | 2.6 | 3.0 | H <sub>1</sub> - oPh             | 2.9  | 2.6 | 4.9 | 3.0 | 4.5 |
| H <sub>4</sub> - oPh             | 5.85               | 4.0                | 5.0              | 4.4 | 2.7 | 4.2 | H <sub>4</sub> - oPh             | 3.7  | 4.2 | 3.5 | 4.5 | 2.3 |
| H <sub>2</sub> - oPh             | 2.80               | 2.9                | 3.1              | 2.8 | 4.5 | 3.2 | H <sub>2</sub> - oPh             | 2.8  | 2.6 | 2.8 | 3.0 | 3.0 |
| H <sub>3</sub> - oPh             | 2.78               | 3.0                | 3.1              | 3.1 | 4.3 | 5.2 | H <sub>3</sub> - oPh             | 2.9  | 3.1 | 2.4 | 4.4 | 2.8 |
| H <sub>7</sub> - oPh             | 4.30               | 4.6                | 4.6              | 4.3 | 2.5 | 2.1 | H <sub>7</sub> - oPh             | 4.2  | 4.5 | 2.3 | 2.1 | 4.7 |

[a] Taken from reference<sup>51</sup>. [b] This work, see SI. [c] for conformer structures see section 7.

## 9. References

- S1 E. Cesarotti, G. Ciani, A. Sironi, *J. Organomet. Chem.* 1981, **216**, 87 - 95
- S2 P. Scafato, F. Caprioli, L. Pisani, D. Padula, F. Santoro, G. Mazzeo, S. Abbate, F. Lebon, G. Longhi, *Tetrahedron* 2013, **69**, 10752 - 10762
- S3 (a) Borgias, B. A.; Gochin, M.; Kerwood, D. J.; James, T. L. *Prog. Nucl. Magn. Reson. Spectrosc.* **1990**, *22*, 83 (b) Perrin, C. L.; Gipe, R. K. *J. Am. Chem. Soc.* 1984, **106**, 4036 (c) Abel, E. W.; Coston, T. P. J.; Orrell, K. G.; Šik, V.; Stephenson, D. *J. Magn. Reson.*, 1986, **70**, 34. (d) L. Cronin, C. L. Higgitt, R. N. Perutz, *Organometallics* 2000, **19**, 672-683;
- S4 C. Zuccaccia, G. Bellachioma, G. Cardaci, A. Macchioni, *J. Am. Chem. Soc.* 2001, **123**, 11020–11028.
- S5 Gaussian 09, Revision D.01, Frisch, M. J.; Trucks, G. W.; Schlegel, H. B.; Scuseria, G. E.; Robb, M. A.; Cheeseman, J. R.; Scalmani, G.; Barone, V.; Mennucci, B.; Petersson, G. A.; Nakatsuji, H.; Caricato, M.; Li, X.; Hratchian, H. P.; Izmaylov, A. F.; Bloino, J.; Zheng, G.; Sonnenberg, J. L.; Hada, M.; Ehara, M.; Toyota, K.; Fukuda, R.; Hasegawa, J.; Ishida, M.; Nakajima, T.; Honda, Y.; Kitao, O.; Nakai, H.; Vreven, T.; Montgomery, J. A., Jr.; Peralta, J. E.; Ogliaro, F.; Bearpark, M.; Heyd, J. J.; Brothers, E.; Kudin, K. N.; Staroverov, V. N.; Kobayashi, R.; Normand, J.; Raghavachari, K.; Rendell, A.; Burant, J. C.; Iyengar, S. S.; Tomasi, J.; Cossi, M.; Rega, N.; Millam, M. J.; Klene, M.; Knox, J. E.; Cross, J. B.; Bakken, V.; Adamo, C.; Jaramillo, J.; Gomperts, R.; Stratmann, R. E.; Yazyev, O.; Austin, A. J.; Cammi, R.; Pomelli, C.; Ochterski, J. W.; Martin, R. L.; Morokuma, K.; Zakrzewski, V. G.; Voth, G. A.; Salvador, P.; Dannenberg, J. J.; Dapprich, S.; Daniels, A. D.; Farkas, Ö.; Foresman, J. B.; Ortiz, J. V.; Cioslowski, J.; Fox, D. J. Gaussian, Inc., Wallingford CT, **2009**.
- S6 Ruzziconi, R.; Bellachioma, G.; Giancaleoni, G.; Lepri, S.; Superchi, S.; Zanasi, R.; Monaco, G., *Dalton Trans.*, 2014, **43**, 1636-1650
- S7 a) S. Grimme, *J. Comput. Chem.* 2006, **27**, 1787–1799; b) S. Grimme, J. Antony, S. Ehrlich, H. Krieg, *J. Chem. Phys.* 2010, **132**, 154104
- S8 A. Schäfer, H. Horn, R. Ahlrichs, *J. Chem. Phys.* 1992, **97**, 2571-2577.
